## **Sputum microbiome $\alpha$ -diversity is a key feature of the COPD frequent exacerbator phenotype**

Alexa A. Pragman,<sup>1</sup> Shane W. Hodgson,<sup>2</sup> Tianhua Wu,<sup>3</sup> Allison Zank,<sup>2</sup> Cavan S. Reilly,<sup>3</sup> and Chris H. Wendt<sup>1</sup>

Affiliations: <sup>1</sup>Department of Medicine, Minneapolis VA Health Care System and Department of Medicine, University of Minnesota, Minneapolis, MN; <sup>2</sup>Research Service, Minneapolis VA Health Care System, Minneapolis, MN; <sup>3</sup>Division of Biostatistics, University of Minnesota, Minneapolis, MN.

Corresponding author: Alexa A. Pragman, Minneapolis VA Health Care System, 111F, 1 Veterans Dr., Minneapolis, MN 55417; 612-467-6671; 612-725-2273; alexa@umn.edu

Take home message: Low sputum microbiome  $\alpha$ -diversity and decreased compositional stability (increased  $\beta$ -diversity) are associated with the COPD frequent exacerbator phenotype. Low sputum microbiome  $\alpha$ -diversity is also associated with lung inflammation.

Authors' contributions: Conception and Design: A.A.P., C.S.R., and C.H.W. Data Acquisition: A.A.P., S.W.H., and A.Z. Data analysis: A.A.P., T.W., C.S.R., and C.H.W. Data interpretation: A.A.P., T.W., C.S.R., and C.H.W. Drafting the manuscript: A.A.P. Revision and final approval of the version to be published: All authors.

## 1 **ABSTRACT**

2 Background: The lung microbiome is an inflammatory stimulus whose role in chronic  
3 obstructive pulmonary disease (COPD) pathogenesis is incompletely understood. We  
4 hypothesized that the frequent exacerbator phenotype is associated with decreased  $\alpha$ -  
5 diversity and increased lung inflammation. Our objective was to assess correlations  
6 between the frequent exacerbator phenotype, the microbiome, and inflammation  
7 longitudinally during exacerbation-free periods.

8 Methods: We conducted a case-control longitudinal observational study of the frequent  
9 exacerbator phenotype and characteristics of the airway microbiome. Eighty-one  
10 subjects (41 frequent and 40 infrequent exacerbators) provided nasal, oral, and sputum  
11 microbiome samples at two visits over 2-4 months. Exacerbation phenotype, relevant  
12 clinical factors, and sputum cytokine values were associated with microbiome findings.

13 Results: The frequent exacerbator phenotype was associated with lower sputum  
14 microbiome  $\alpha$ -diversity ( $p=0.0031$ ). This decrease in  $\alpha$ -diversity among frequent  
15 exacerbators was enhanced when the sputum bacterial culture was positive ( $p<0.001$ ).  
16 Older age was associated with decreased sputum microbiome  $\alpha$ -diversity ( $p=0.0030$ ).  
17 Between-visit  $\beta$ -diversity was increased among frequent exacerbators and those who  
18 experienced a COPD exacerbation between visits ( $p=0.025$ ,  $p=0.014$ ). Sputum cytokine  
19 values did not differ based on exacerbation phenotype or other clinical characteristics.  
20 IL-17A was negatively associated with  $\alpha$ -diversity, while IL-6 and IL-8 were positively  
21 associated with  $\alpha$ -diversity ( $p=0.012$ ,  $p=0.012$ ,  $p=0.0496$ ). IL-22, IL-17A, and IL-5 levels  
22 were positively associated with *Moraxella* abundance ( $p=0.027$ ,  $p=0.0014$ ,  $p=0.0020$ ).

23 Conclusions: Even during exacerbation-free intervals, the COPD frequent exacerbator  
24 phenotype is associated with decreased sputum microbiome  $\alpha$ -diversity and increased  
25  $\beta$ -diversity. Decreased sputum microbiome  $\alpha$ -diversity and *Moraxella* abundance are  
26 associated with lung inflammation.

## 27 INTRODUCTION

28

29 Chronic obstructive pulmonary disease (COPD) is a leading cause of death, however  
30 the mechanisms driving its progression remain incompletely understood. One recently  
31 recognized mechanism is inflammation triggered by the lung microbiome. Cycles of  
32 recurrent lung infection, inflammation, and antibiotic use may disrupt the microbiome  
33 with downstream consequences for lung function [1]. Even in the absence of clinical  
34 infection, COPD patients with pathogenic bacteria in their airways have higher levels of  
35 sputum and systemic inflammatory markers and increased pulmonary symptoms [2, 3].

36

37 The COPD frequent exacerbator phenotype identifies a subset of patients at high risk of  
38 recurrent COPD exacerbation. Frequent exacerbators (FE) suffer increased morbidity  
39 and mortality compared to those who experience exacerbations less often [4–7].

40 Approximately half of COPD exacerbations are attributed to bacterial infection, and  
41 pathogenic bacteria such as *Haemophilus influenzae*, *Moraxella catarrhalis*, and  
42 *Streptococcus pneumoniae* are often identified in the lung microbiome of COPD  
43 patients even during periods of stable lung disease [3].

44

45 Inflammatory markers are increased in the sputum of FE [8–10] and COPD patients  
46 colonized with potentially pathogenic bacteria [9, 11–15]. The COPD lung microbiome  
47 provides an inflammatory stimulus, even in the absence of overt lung infection. In  
48 particular, IL-17A, IL-8, IL-6, IL-1 $\beta$ , IL-22, IL-5, and leukotriene B4 (LTB4) levels in  
49 sputum have been associated with various components of the COPD lung microbiome

50 during exacerbation-free intervals [2, 8, 11–19]. It remains unclear which particular  
51 components of the microbiome (bacterial biomass,  $\alpha$ -diversity, the particular taxa  
52 present, etc.) are most closely associated with sputum inflammation or the FE  
53 phenotype.

54  
55 We and others have shown that the sputum microbiome of FE has lower alpha diversity  
56 compared to non-FE [18, 20–26]. Few of these studies, however, evaluate the COPD  
57 lung microbiome solely during periods of clinical stability (when findings are less  
58 influenced by exacerbation treatments), longitudinally, and including an analysis of  
59 concurrent lung inflammation. We undertook the present case-control longitudinal  
60 observational study of COPD exacerbation phenotype, the upper airway and sputum  
61 microbiome, and lung inflammation to address these gaps.

62

## 63 **METHODS**

64 **Study design and recruitment.** We conducted a case-control longitudinal  
65 observational study of exacerbation phenotype and characteristics of the upper airway  
66 and sputum microbiome. All participants were recruited from a single site and were age  
67 40 or older with COPD. Frequent exacerbators (FE) had at least one severe  
68 exacerbation (an exacerbation requiring hospital admission or emergency department  
69 visit) in the last 12 months, in accordance with descriptions found in GOLD guidelines  
70 [27]. Infrequent exacerbators (IE) must have had 0 exacerbations in the prior 24  
71 months. Recruitment and all visits/samples were deferred until participants had  
72 recovered for at least 1 month from the most recent exacerbation. The protocol was

73 approved by the Minneapolis VA IRB (#4541-B). Additional details on recruitment and  
74 other methods can be found in the supplementary information. Samples from 22  
75 participants have been previously published (PRJNA543785) [20], however all data  
76 analyzed here were re-sequenced for this analysis (PRJNA944199).

77

78 **Study procedures.** At visit 1, participants provided their medical history, underwent  
79 spirometry, completed the St. George's Respiratory Questionnaire (SGRQ), and  
80 provided oral wash, nasal swab, and induced sputum samples. All participants returned  
81 for a second study visit ~2 months following visit 1, where they provided information on  
82 interim COPD exacerbations, repeated the SGRQ, and provided oral, nasal, and  
83 sputum samples. Visit 2 was deferred (for up to 4 months following visit 1) if the  
84 participant reported any COPD exacerbations or antibiotic use in the 1 month prior to  
85 the visit. Exacerbation phenotype was determined at visit 1 and was not revised based  
86 on exacerbations observed during the study.

87

88 **Sample processing, 16S rRNA gene quantification, and MiSeq sequencing.** All  
89 samples and negative controls were extracted using the MO BIO PowerSoil DNA  
90 Isolation Kit (QIAGEN, Germantown, MD). Extracted DNA underwent 16S rRNA gene  
91 quantification using droplet digital PCR (ddPCR) and 16S rRNA gene V4 MiSeq  
92 sequencing. 16S rRNA V4 sequences were processed as described in the  
93 supplementary information.

94

95 **Sputum culture results.** The clinical microbiology laboratory performed Gram stain  
96 and aerobic culture on all sputum samples. Any organism identified in culture was  
97 considered a pathogen.

98  
99 **Cytokine analyses.** Sputum samples were submitted to the University of Minnesota  
100 Cytokine Reference Laboratory for determination of LTB<sub>4</sub>, GM-CSF, IL-8, IL-6, IL-1 $\beta$ ,  
101 IL-17A, IL-22, IL-5, and TNF- $\alpha$  (R&D Systems, Minneapolis, MN USA).

102  
103 **Statistical analyses.** Data presented is from visit 1 only (V1) or both visits (BV), as  
104 described in the text. Linear regression (LR), including random effects censored  
105 regression models, linear mixed models (LMM), and generalized estimating equations  
106 (GEE), were used to test for associations between variables. Analyses of  $\alpha$ -diversity  
107 metrics were adjusted for age, forced expiratory volume in 1 second percent predicted  
108 (FEV<sub>1pp</sub>), BMI, current tobacco use, and current alcohol use.  $\beta$ -diversity was assessed  
109 via the Bray-Curtis dissimilarity metric and illustrated via principal coordinates analysis  
110 (PCoA). Univariate PERMANOVA analyses of  $\beta$ -diversity were performed for each  
111 anatomical site. Permutation tests were used to determine if within-subject visit 1-visit 2  
112 similarity differed by permuting levels of categorical clinical factors. After eliminating  
113 genera present in <10% of samples, tests of association between taxa and clinical  
114 characteristics used Holm's procedure to control the family-wise error rate across all  
115 taxa at 5%. GM-CSF and TNF- $\alpha$  were not analyzed and IL-22 results were  
116 dichotomized (detected vs. not detected) as too few samples contained quantifiable  
117 results. Random effects censored regression models were used to test for associations

118 between clinical or microbiome characteristics and cytokine levels (modeled as the  
119 response variable). All analyses were conducted in R version 3.6.0.

120

## 121 **RESULTS**

122 **Cohort.** Eighty-one subjects consisting of 40 IE and 41 FE provided data and samples  
123 during two visits over 2-4 months. Subjects were balanced with respect to age, gender,  
124 race, ICS use, and dental care habits (Table 1). Consistent with the VA patient  
125 population, most subjects were male. FE phenotype was associated with lower BMI  
126 (median 27.9 vs. 30.2,  $p=0.022$ ), lower FEV<sub>1</sub>pp (44.0 vs. 52.5,  $p<0.001$ ), and a higher  
127 number of COPD exacerbations in the last 12 months (median 2 vs. 0, mean 2.39 vs.  
128 0). FE were less likely than IE to be current tobacco users (19.5% FE vs. 42.5% IE,  
129  $p=0.032$ ). Relationships between microbiome measures at each site and clinical factors  
130 (exacerbation phenotype, age, FEV<sub>1</sub>pp, ICS use, pack-years of tobacco use, current  
131 tobacco use, toothbrushing frequency, SGRQ score, pathogen detection in sputum  
132 samples, or experiencing a COPD exacerbation or use of an antibiotic between study  
133 visits) were examined; unless mentioned, these analyses did not reveal an association.

134

135 **Alpha Diversity.** Alpha diversity was assessed using Shannon diversity, Simpson  
136 diversity, and Chao1 metrics. For simplicity, Simpson diversity findings are discussed in  
137 detail here (Figure E1), as they are largely consistent with the Shannon and Chao1  
138 diversity findings.

139



140 *Nasal samples.* No significant relationships between nasal sample Simpson diversity  
141 and any of the evaluated clinical factors were observed.

142

143 *Oral samples.* In multiple models of oral wash Simpson diversity, FEV1pp (a model  
144 covariate) was consistently associated with increased oral wash Simpson diversity (FE  
145 phenotype V1 LR, FEV1pp coefficient estimate [CE] 0.0008, 95% confidence interval  
146 [CI, 0.00002, 0.0016],  $p=0.027$ , Figure 1A; BV GEE, FEV1pp CE 0.0007, 95% CI  
147 [0.0001, 0.0013],  $p=0.023$ ). In light of this association, we further evaluated potential  
148 relationships between FE phenotype, FEV1pp and Simpson diversity. In a model of FE  
149 phenotype, FEV1pp, and their interaction, FE phenotype and the interaction of FE  
150 phenotype and FEV1pp were associated with oral wash Simpson diversity (interaction  
151 BV GEE CE 0.0010, 95% CI [0.00002, 0.0020],  $p=0.048$ ). Higher SGRQ scores  
152 (indicating worse quality of life) were associated with lower oral wash Simpson diversity  
153 (V1 LR, CE -0.0007, 95% CI [-0.0013, -0.00011],  $p=0.018$ , Figure 1B; and BV GEE, CE  
154 -0.0005, 95% CI [-0.0009, -0.0001],  $p=0.020$ ).

155

156 *Sputum samples.* The FE phenotype was associated with lower Simpson diversity in  
157 sputum at V1 and BV (V1 LR, CE -0.077, 95% CI [-0.15, -0.0048],  $p=0.041$ , Figure E2;  
158 BV GEE, CE -0.075, 95%CI [-0.12, -0.025],  $p=0.0031$ ). Older age (another model  
159 covariate) was also associated with lower sputum Simpson diversity in a model of  
160 exacerbation phenotype (V1 LR, age CE -0.0090, 95% CI [-0.015, -0.0025],  $p=0.0080$ ,  
161 Figures 2a and E3; BV GEE, age CE -0.0074, 95% CI [-0.012, -0.0025],  $p=0.0030$ ).

162

163 When exacerbation phenotype, age, and their interaction were included in a model of  
164 sputum  $\alpha$ -diversity, their interaction was significantly associated with lower Simpson  
165 diversity (V1 LR, interaction CE -0.013, 95% CI [-0.024, -0.0024],  $p=0.020$ , Figure 2A;  
166 BV GEE, interaction CE -0.0099, 95% CI [-0.018, -0.0017],  $p=0.017$ ). This shows that  
167 the association between exacerbation phenotype and sputum Simpson diversity differs  
168 based on age.

169  
170 Sputum samples from 6 subjects (3 FE and 3 IE) were positive for clinically relevant  
171 respiratory pathogens (*Moraxella catarrhalis*, *Haemophilus influenzae*, methicillin-  
172 resistant *Staphylococcus aureus*, and *Klebsiella pneumoniae*) at visit 1. Presence of a  
173 pathogen was associated with lower sputum Simpson diversity at V1 and BV (V1 LR,  
174 CE -0.19, 95% CI [-0.31, -0.074],  $p=0.0028$ ; BV LMM, CE -0.20, 95% CI [-0.26, -0.14],  
175  $p<0.001$ ). When FE phenotype, pathogen, and their interaction were included in the  
176 model, only their interaction was significant at V1 and BV (V1 LR, CE -0.46, 95% CI [-  
177 0.63, -0.30],  $p<0.001$ , Figure 2B; BV LMM, CE -0.27, 95% CI [-0.38, -0.15],  $p<0.001$ ).  
178 This shows that the association between sputum culture positivity during clinically stable  
179 periods and Simpson diversity differs based on exacerbation phenotype.

180  
181 In summary, sputum  $\alpha$ -diversity is associated with FE phenotype, age, and pathogen  
182 detection in sputum culture during clinically stable periods. The association between FE  
183 phenotype and decreased sputum  $\alpha$ -diversity is also modified by older age or the  
184 identification of a pathogen from sputum culture.

185

186 *Alpha diversity over time.* Visit 1 values were significantly associated with visit 2 values  
187 at all sites (data not shown). Self-reported COPD exacerbation or self-reported use of  
188 an antibiotic for any indication in between study visits was not associated with  $\alpha$ -  
189 diversity at visit 2 (when baseline values were included in the models). Exacerbation  
190 phenotype, age, FEV1pp, current tobacco use, pack-years of tobacco use, and SGRQ  
191 score were not associated with a change in  $\alpha$ -diversity between study visits.

192

193 **Beta diversity.** Environmental, equipment, and reagent control samples were distinct  
194 from subject samples (Figure E4). After subsampling to include only subject samples  
195 from visit 1, PCoA revealed significant clustering by anatomic site (PERMANOVA,  
196  $p=0.001$  for all pair-wise testing; Figure 3).

197

198 *PERMANOVA analyses.* Clustering on PCoA based on exacerbation phenotype and  
199 other clinical factors was investigated using PERMANOVA analyses. The analyses  
200 were conducted at each anatomic site separately and using visit 1 data, unless noted  
201 below. At visit 1, nasal samples clustered based on FEV1pp (PERMANOVA,  $R^2=0.029$ ,  
202  $p=0.033$ ). Several other PERMANOVA results with  $p<0.10$  are provided in Table E1.  
203 When visit 2 data were analyzed, sputum samples from participants who reported  
204 between-visit antibiotic use for any indication clustered separately from participants who  
205 did not report between-visit antibiotic use (PERMANOVA,  $R^2=0.029$ ,  $p=0.049$ ).

206

207 *Beta-diversity over time.* Visit 1 samples were compared to corresponding visit 2  
208 samples for all subjects and sites to assess the stability of microbiome composition over

209 time. Among nasal samples, the FE phenotype and antibiotic use between study visits  
210 was associated with decreased similarity between paired samples (permutation testing  
211 [P],  $p=0.044$  and  $p=0.032$ , respectively). There were no associations with oral wash  
212 similarity between visits. Among sputum samples, the FE phenotype and experiencing a  
213 COPD exacerbation between visits were associated with lower similarity between paired  
214 samples (P,  $p=0.025$  and  $p=0.014$ , respectively; Figure 4).

215  
216 **Bacterial taxa.** We investigated the bacterial taxa present in each sample to determine  
217 potential associations with relevant clinical factors (97 tests). Many taxa were  
218 associated with clinical site, in accordance with clinical findings and the human  
219 microbiome literature. Nasal samples were enriched with *Corynebacterium*,  
220 *Staphylococcus*, *Cutibacterium*, and *Moraxella* (among others) compared with oral and  
221 sputum samples (LR, all  $p<0.05$  following Holm correction; Table E2). Oral and sputum  
222 samples were enriched with *Veillonella*, *Rothia*, *Prevotella*, *Streptococcus*, and  
223 *Haemophilus* (among others) when compared with nasal samples (LR, all  $p<0.05$   
224 following Holm correction; Table E3). Across all anatomic sites, *Mannheimia* abundance  
225 was positively associated with age (LR,  $p=0.0014$ ); *Mogibacterium* abundance was  
226 lower among FE compared to IE ( $p=0.029$ ); *Leuconostoc* abundance was negatively  
227 associated with FEV1pp ( $p=0.020$ ); *Bulleidia* abundance was higher among current  
228 tobacco users ( $p=0.013$ ); and *Pseudomonas* abundance was positively associated with  
229 pack-years of tobacco use ( $p<0.0001$ ).

230

231 **Sputum cytokine analyses.** Sputum sample cytokine levels were tested for an  
232 association with clinical factors and sputum microbiome characteristics. Cytokines were  
233 chosen for analysis based on prior reported associations with culture or microbiome  
234 results, and analyses of the 7 evaluable cytokines are provided here. Samples from all  
235 available visits were analyzed using GEE or random effects censored regression  
236 models, as appropriate, accounting for visit.

237  
238 *Cytokines associated with clinical characteristics.* None of the clinical factors  
239 (exacerbation phenotype, age, FEV1pp, pack-years of tobacco exposure, current  
240 tobacco use, or SGRQ score) were associated with cytokine levels in a random effects  
241 censored regression model.

242  
243 *Cytokines associated with Alpha diversity (Simpson).* Three sputum cytokines were  
244 associated with sputum sample  $\alpha$ -diversity on univariate analysis. IL-17A levels were  
245 negatively associated with Simpson diversity, while IL-6 and IL-8 were positively  
246 associated with Simpson diversity (random effects censored regression model, IL-17A  
247 CE -1.3, 95% CI [-2.2, -0.50],  $p=0.012$ ; IL-6 CE 6.0, 95% CI [2.2, 9.8],  $p=0.012$ ; and IL-8  
248 CE 4.2, 95% CI [1.0, 7.4],  $p=0.0496$ ; respectively; Figure 5). IL-22, IL-5, IL-1 $\beta$ , and  
249 LTB4 were not associated with Simpson diversity.

250  
251 *Cytokines associated with positive bacterial sputum culture.* Presence of typical COPD  
252 pathogens in sputum samples, such as *Streptococcus*, *Moraxella*, or *Haemophilus*,  
253 have been associated with exacerbation phenotype, increased inflammation, and

254 decreased  $\alpha$ -diversity. We found that IL-22, IL-17A, and IL-5 levels were positively  
255 associated with *Moraxella* abundance (GEE with Holm correction, IL-22 CE 10.26, 95%  
256 CI [3.96, 16.55],  $p=0.027$ ; random effects censored regression model with Holm  
257 correction, IL-17A CE 2.01, 95% CI [1.02, 2.99],  $p=0.0014$ ; and IL-5 CE 1.87, 95% CI [0.  
258 93, 2.81],  $p=0.002$ , respectively; Figure 6). There were no significant associations with  
259 other cytokines or the genera *Streptococcus* or *Haemophilus*.

260

## 261 **DISCUSSION**

262 Our case-control longitudinal observational study of the upper airway and sputum  
263 microbiome during periods of clinical stability identified low sputum microbiome  $\alpha$ -  
264 diversity as a key feature of the COPD frequent exacerbator phenotype. In turn, low  
265 sputum microbiome  $\alpha$ -diversity was associated with airway bacterial colonization and  
266 lung inflammation, two other characteristics consistent with the increased morbidity and  
267 mortality associated with the frequent exacerbator phenotype. Additionally, the frequent  
268 exacerbator phenotype was associated with decreased microbiome compositional  
269 stability (increased  $\beta$ -diversity) on longitudinal sputum sampling. These findings suggest  
270 that low  $\alpha$ -diversity and an unstable sputum microbiome are key features of the frequent  
271 exacerbator phenotype.

272

273 In addition to our findings on the frequent exacerbator phenotype, we also detected  
274 associations between the sputum, oral, or nasal microbiome and age and COPD-related  
275 symptom severity. Also, among the small number of subjects who experienced an  
276 exacerbation between study visits, we observed compositional changes (increased  $\beta$ -

277 diversity) in the microbiome following the occurrence of a COPD exacerbation. Our  
278 study determined that the frequent exacerbator phenotype is associated with low  
279 sputum microbiome  $\alpha$ -diversity. Low  $\alpha$ -diversity among FE has been found by many—  
280 but not all—investigators, possibly related to differences in how exacerbation frequency  
281 was analyzed [20, 22–26, 28, 29]. In the case of the sputum microbiome, this  
282 homogeneity was enhanced among older participants and among participants with  
283 airway bacterial colonization. This phenotype also correlated with increased  
284 *Mogibacterium*, an oral taxon associated with oral inflammation and stable COPD [30,  
285 31].

286  
287 In this study and others, older age was associated with decreased  $\alpha$ -diversity among  
288 sputum samples [23, 28]. Here, we also determined that older age is associated with a  
289 further decrease in  $\alpha$ -diversity among FE. Although aging is associated with an  
290 increased likelihood of COPD diagnosis—as well as increased susceptibility to lung  
291 infections and declines in lung function—the associations between aging and the  
292 microbiome are relatively understudied. The aging COPD lung microbiome and the gut-  
293 lung axis may exist at a juncture between declining lung function, immunosenescence,  
294 nutritional changes, and increased antibiotic use [32]. Our work suggests that age itself  
295 may influence the COPD lung microbiome, possibly via mechanisms independent of  
296 typical factors (such as COPD exacerbations) that are known to influence the lung  
297 microbiome.

298

299 Our analysis of associations between the microbiome and tobacco use encompassed  
300 both pack-years of tobacco use as well as current (vs. former) tobacco use status.  
301 Consistent with many of the previous studies [33–35], which identified more tobacco-  
302 associated microbiome changes of the upper vs. lower airway, we identified that greater  
303 pack-years of tobacco exposure were associated with increased *Pseudomonas*  
304 abundance, while current (vs. former) tobacco use was associated with increased  
305 *Bulleidia* abundance, primarily in the oropharynx. *Bulleidia* has previously been  
306 associated with tobacco use and lung cancer [36, 37].

307  
308 The present study also evaluated the longitudinal stability of the upper and lower airway  
309 microbiome. Although microbiome findings were generally similar on repeated sampling  
310 (low  $\beta$ -diversity), we identified several scenarios in which  $\beta$ -diversity was increased. The  
311 sputum microbiome of FE exhibited decreased similarity (increased  $\beta$ -diversity)  
312 compared with IE. Subjects who experienced a COPD exacerbation between study  
313 visits also exhibited decreased compositional similarity vs. those who did not report  
314 interim exacerbations.

315  
316 We also found significant differences in sputum cytokine levels which associated with  
317 sputum microbiome  $\alpha$ -diversity, but not related to exacerbation phenotype, COPD  
318 severity, age, tobacco use, or COPD-related quality of life. Low sputum  $\alpha$ -diversity was  
319 associated with increased concentrations of sputum IL-17A and decreased  
320 concentrations of IL-6 and IL-8. *Moraxella* abundance in the sputum microbiome was  
321 also associated with increased concentrations of IL-22, IL-17A, and IL-5. IL-17A, IL-22,



322 and IL-6 are key mediators of a Th17 response, often at mucosal sites [38]. IL-8 is a  
323 neutrophil chemoattractant. IL-5 is involved in Th2 responses and eosinophil  
324 recruitment. In prior COPD studies, elevated sputum IL-6 and IL-8 levels have been  
325 associated with tobacco use, lower FEV<sub>1</sub>pp, frequent exacerbations, and acute  
326 exacerbation (vs. clinical stability) [8, 39–42]. Our finding of a positive association  
327 between IL-6 and IL-8 levels and  $\alpha$ -diversity is somewhat unexpected, but it is possible  
328 that the acute rise in IL-6 and IL-8 observed during exacerbations is not reflected in our  
329 samples, which were collected during exacerbation-free intervals. Furthermore, few  
330 investigators have assessed the sputum microbiome—specifically low  $\alpha$ -diversity—in  
331 relationship to inflammatory cytokines.

332  
333 Our manuscript has several strengths. We used well-defined FE and IE phenotypes  
334 consistent with GOLD guidelines [27], allowing us address associations between the  
335 microbiome and exacerbation phenotype. We deferred all study visits for 1 month  
336 following a COPD exacerbation or antibiotic use for any reason, in order to focus on the  
337 microbiome during periods of clinical stability. This approach minimizes, to the extent  
338 possible in an observational study of COPD, the influence of recent antibiotic or  
339 systemic steroid use on our microbiome findings. Lastly, our longitudinal approach  
340 allowed us to assess the stability of microbiome composition in relationship to  
341 exacerbation phenotype and recent COPD exacerbations. Our use of sputum  
342 inflammatory cytokines, in the context of the microbiome findings, identified clinical  
343 correlates of our microbiome findings.

344

345 Despite these strengths, our study had several relative weaknesses. We are unable to  
346 assess the influence of sex on the microbiome, as our single-center study was  
347 conducted at a Veterans Affairs hospital with a limited female population. Sputum  
348 samples may be contaminated by saliva during expectoration and therefore may not  
349 reflect only the lower airway microbiome. Despite this potential limitation, we note that  
350 most of our key microbiome findings were identified only in the sputum microbiome and  
351 not identified in the oral microbiome. This suggests that sputum analysis can identify  
352 microbiome associations unique to the lower airways, despite potential upper airway  
353 contamination.

354

355 In conclusion, we found that FEs exhibit lower sputum microbiome  $\alpha$ -diversity, which is  
356 enhanced by older age or bacterial colonization of the airways. Sputum microbiome  $\alpha$ -  
357 diversity is a significant correlate of lung inflammation. The sputum microbiome  
358 composition of FEs changes more over time when compared to the compositional  
359 stability of IEs.

360 **ACKNOWLEDGEMENTS**

361

362 The authors wish to thank Ms. Susan Johnson, LPN, for assistance with study  
363 recruitment. This material is based upon work supported by the Department of Veterans  
364 Affairs, Veterans Health Administration, Office of Research and Development (Clinical  
365 Sciences Research and Development). The views expressed in this article are those of  
366 the authors and do not necessarily reflect the position or policy of the Department of  
367 Veterans Affairs or the United States government. This publication was supported by  
368 Grant Number 1UL1RR033183 from the National Center for Research Resources  
369 (NCRR) and by Grant Number 8 UL1 TR000114-02 from the National Center for  
370 Advancing Translational Sciences (NCATS) of the National Institutes of Health (NIH) to  
371 the University of Minnesota Clinical and Translational Science Institute (CTSI). Its  
372 contents are solely the responsibility of the authors and do not necessarily represent the  
373 official views of the CTSI or the NIH. The University of Minnesota CTSI is part of a  
374 national Clinical and Translational Science Award (CTSA) consortium created to  
375 accelerate laboratory discoveries into treatments for patients.

376

377 Conflict of interest: None of the authors declare any potential conflict of interest.

378

379 Financial Support: U.S. Department of Veterans Affairs Office of Research and  
380 Development 1 IK2 CX001095, 1 I01 CX002130, and NIH/University of Minnesota  
381 Clinical and Translational Science Institute 1UL1RR033183, 8 UL1 TR000114-02.

382 **Tables:**

383

384 **Table 1. Subject Baseline Characteristics**

|                                                           | Infrequent<br>Exacerbator<br>(N=40) | Frequent<br>Exacerbator<br>(N=41) | Overall<br>(N=81)    | <i>p</i><br>value * |
|-----------------------------------------------------------|-------------------------------------|-----------------------------------|----------------------|---------------------|
| Gender, Male (%)                                          | 40 (100)                            | 40 (97.6)                         | 80 (98.8)            | 1.00                |
| Age, median (IQR)                                         | 69 (5)                              | 69 (8)                            | 69 (7)               | 0.632               |
| Race, Caucasian white (%)                                 | 37 (92.5)                           | 40 (97.6)                         | 77 (95.1)            | 0.359               |
| BMI, median (IQR)                                         | 30.2 (7.79)                         | 27.93 (9.26)                      | 29.57 (8.46)         | 0.022               |
| COPD Severity (%)                                         |                                     |                                   |                      |                     |
| Moderate                                                  | 24 (60)                             | 14 (34.1)                         | 38 (46.9)            |                     |
| Severe                                                    | 14 (35)                             | 18 (43.9)                         | 32 (39.5)            |                     |
| Very Severe                                               | 2 (5)                               | 9 (22)                            | 11 (13.6)            |                     |
| FEV <sub>1</sub> % predicted, median (IQR)                | 52.5 (19)                           | 44 (17)                           | 48 (19)              | < 0.001             |
| COPD exacerbations in the last 12 months, median (IQR)    | 0 (0)                               | 2 (1)                             | 1 (2)                | < 0.001             |
| COPD hospitalizations in the last 12 months, median (IQR) | 0 (0)                               | 0 (1)                             | 0 (0)                | < 0.001             |
| Inhaled corticosteroids, Yes (%)                          | 11 (27.5)                           | 14 (34.1)                         | 25 (30.9)            | 0.632               |
| Pack-years of smoking, median (IQR)                       | 41 (23.12)                          | 50 (23)                           | 50 (24.5)            | 0.059               |
| Current tobacco use, Yes (%)                              | 17 (42.5)                           | 8 (19.5)                          | 25 (30.9)            | 0.032               |
| Current alcohol use, Yes (%)                              | 24 (60)                             | 32 (78)                           | 56 (69.1)            | 0.096               |
| Brush teeth ≥ once daily (%) <sup>a</sup>                 | 30 (75) <sup>a</sup>                | 30 (75) <sup>a</sup>              | 60 (75) <sup>a</sup> | 1.00                |
| SGRQ Score, median (IQR)                                  | 43.62 (10.49)                       | 52.4 (20.6)                       | 47.29 (17.84)        | 0.074               |

385 Frequencies and percentages are presented unless specified otherwise. BMI, body  
 386 mass index; COPD, chronic obstructive pulmonary disease; FEV<sub>1</sub>% predicted, forced  
 387 expiratory volume in 1 s, percent of predicted value; IQR, interquartile range; SGRQ, St.  
 388 George's Respiratory Questionnaire

389 \*A Two-Sample t test was conducted for all continuous variables and a Fisher exact test  
 390 for all categorical variables

391 <sup>a</sup>One subject did not provide frequency of brushing teeth

392

393 **REFERENCES**

394

395 1. Sethi S, Maloney J, Grove L *et al.* Airway inflammation and bronchial bacterial  
396 colonization in chronic obstructive pulmonary disease. *Am J Respir Crit Care Med*  
397 2006; 173: 991-998.

398 2. Desai H, Eschberger K, Wrona C *et al.* Bacterial Colonization Increases Daily  
399 Symptoms in Patients with Chronic Obstructive Pulmonary Disease. *Ann Am*  
400 *Thorac Soc* 2014; 11: 303-309.

401 3. Sethi S, Murphy TF. Bacterial infection in chronic obstructive pulmonary disease in  
402 2000: a state-of-the-art review. *Clinical Microbiology Reviews* 2001; 14: 336-363.

403 4. Carolan BJ, Sutherland ER. Clinical phenotypes of chronic obstructive pulmonary  
404 disease and asthma: recent advances. *J Allergy Clin Immunol* 2013; 131: 627-34;  
405 quiz 635.

406 5. Hurst JR, Vestbo J, Anzueto A *et al.* Susceptibility to exacerbation in chronic  
407 obstructive pulmonary disease. *N Engl J Med* 2010; 363: 1128-1138.

408 6. Soler-Cataluna JJ, Martinez-Garcia MA, Roman Sanchez P *et al.* Severe acute  
409 exacerbations and mortality in patients with chronic obstructive pulmonary disease.  
410 *Thorax* 2005; 60: 925-931.

411 7. Spencer S, Jones PW. Time course of recovery of health status following an  
412 infective exacerbation of chronic bronchitis. *Thorax* 2003; 58: 589-593.

413 8. Bhowmik A, Seemungal TA, Sapsford RJ *et al.* Relation of sputum inflammatory  
414 markers to symptoms and lung function changes in COPD exacerbations. *Thorax*  
415 2000; 55: 114-120.

- 416 9. Garcha DS, Thurston SJ, Patel AR *et al.* Changes in prevalence and load of airway  
417 bacteria using quantitative PCR in stable and exacerbated COPD. *Thorax* 2012;  
418 67: 1075-1080.
- 419 10. Thomsen M, Ingebrigtsen TS, Marott JL *et al.* Inflammatory biomarkers and  
420 exacerbations in chronic obstructive pulmonary disease. *JAMA* 2013; 309: 2353-  
421 2361.
- 422 11. Barker BL, Haldar K, Patel H *et al.* Association between pathogens detected using  
423 quantitative polymerase chain reaction with airway inflammation in COPD at stable  
424 state and exacerbations. *Chest* 2014; 147: 46-55.
- 425 12. Hill AT, Campbell EJ, Hill SL *et al.* Association between airway bacterial load and  
426 markers of airway inflammation in patients with stable chronic bronchitis. *Am J*  
427 *Med* 2000; 109: 288-295.
- 428 13. Marin A, Garcia-Aymerich J, Sauleda J *et al.* Effect of Bronchial Colonisation on  
429 Airway and Systemic Inflammation in Stable COPD. *COPD* 2012; 9: 121-130.
- 430 14. Patel IS, Seemungal TA, Wilks M *et al.* Relationship between bacterial colonisation  
431 and the frequency, character, and severity of COPD exacerbations. *Thorax* 2002;  
432 57: 759-764.
- 433 15. Stockley RA, Hill AT, Hill SL *et al.* Bronchial inflammation: its relationship to  
434 colonizing microbial load and alpha(1)-antitrypsin deficiency. *Chest* 2000; 117:  
435 291S-3S.
- 436 16. Singh R, Mackay AJ, Patel AR *et al.* Inflammatory thresholds and the species-  
437 specific effects of colonising bacteria in stable chronic obstructive pulmonary  
438 disease. *Respir Res* 2014; 15: 114.

- 439 17. Ramsheh MY, Haldar K, Esteve-Codina A *et al.* Lung microbiome composition and  
440 bronchial epithelial gene expression in patients with COPD versus healthy  
441 individuals: a bacterial 16S rRNA gene sequencing and host transcriptomic  
442 analysis. *Lancet Microbe* 2021; 2: e300-e310.
- 443 18. Wang Z, Locantore N, Haldar K *et al.* Inflammatory Endotype-associated Airway  
444 Microbiome in Chronic Obstructive Pulmonary Disease Clinical Stability and  
445 Exacerbations: A Multicohort Longitudinal Analysis. *Am J Respir Crit Care Med*  
446 2021; 203: 1488-1502.
- 447 19. Tufvesson E, Bjermer L, Ekberg M. Patients with chronic obstructive pulmonary  
448 disease and chronically colonized with *Haemophilus influenzae* during stable  
449 disease phase have increased airway inflammation. *Int J Chron Obstruct Pulmon*  
450 *Dis* 2015; 10: 881-889.
- 451 20. Pragman AA, Knutson KA, Gould TJ *et al.* Chronic obstructive pulmonary disease  
452 upper airway microbiota alpha diversity is associated with exacerbation phenotype:  
453 a case-control observational study. *Respir Res* 2019; 20: 114.
- 454 21. Wang Z, Singh R, Miller BE *et al.* Sputum microbiome temporal variability and  
455 dysbiosis in chronic obstructive pulmonary disease exacerbations: an analysis of  
456 the COPDMAP study. *Thorax* 2017; 73: 331-338.
- 457 22. Mayhew D, Devos N, Lambert C *et al.* Longitudinal profiling of the lung microbiome  
458 in the AERIS study demonstrates repeatability of bacterial and eosinophilic COPD  
459 exacerbations. *Thorax* 2018; 73: 422-430.

- 460 23. Li W, Wang B, Tan M *et al.* Analysis of sputum microbial metagenome in COPD  
461 based on exacerbation frequency and lung function: a case control study. *Respir*  
462 *Res* 2022; 23: 321.
- 463 24. Dicker AJ, Huang JTJ, Lonergan M *et al.* The sputum microbiome, airway  
464 inflammation, and mortality in chronic obstructive pulmonary disease. *J Allergy Clin*  
465 *Immunol* 2021; 147: 158-167.
- 466 25. Yang CY, Li SW, Chin CY *et al.* Association of exacerbation phenotype with the  
467 sputum microbiome in chronic obstructive pulmonary disease patients during the  
468 clinically stable state. *J Transl Med* 2021; 19: 121.
- 469 26. Su L, Qiao Y, Luo J *et al.* Exome and Sputum Microbiota as Predictive Markers of  
470 Frequent Exacerbations in Chronic Obstructive Pulmonary Disease. *Biomolecules*  
471 2022; 12
- 472 27. Agustí A, Celli BR, Criner GJ *et al.* Global Initiative for Chronic Obstructive Lung  
473 Disease 2023 Report: GOLD Executive Summary. *Eur Respir J* 2023; 61
- 474 28. Millares L, Pascual S, Montón C *et al.* Relationship between the respiratory  
475 microbiome and the severity of airflow limitation, history of exacerbations and  
476 circulating eosinophils in COPD patients. *BMC Pulm Med* 2019; 19: 112.
- 477 29. Wang Z, Maschera B, Lea S *et al.* Airway host-microbiome interactions in chronic  
478 obstructive pulmonary disease. *Respir Res* 2019; 20: 113.
- 479 30. Li Q, Pu Y, Lu H *et al.* *Porphyromonas*, *Treponema*, and *Mogibacterium* promote  
480 IL8/IFN $\gamma$ /TNF $\alpha$ -based pro-inflammation in patients with medication-related  
481 osteonecrosis of the jaw. *J Oral Microbiol* 2020; 13: 1851112.



- 482 31. Huang YJ, Sethi S, Murphy T *et al.* Airway microbiome dynamics in exacerbations  
483 of chronic obstructive pulmonary disease. *J Clin Microbiol* 2014; 52: 2813-2823.
- 484 32. Saint-Criq V, Lugo-Villarino G, Thomas M. Dysbiosis, malnutrition and enhanced  
485 gut-lung axis contribute to age-related respiratory diseases. *Ageing Res Rev* 2020;  
486 66: 101235.
- 487 33. Morris A, Beck JM, Schloss PD *et al.* Comparison of the respiratory microbiome in  
488 healthy nonsmokers and smokers. *Am J Respir Crit Care Med* 2013; 187: 1067-  
489 1075.
- 490 34. Pfeiffer S, Herzmann C, Gaede KI *et al.* Different responses of the oral, nasal and  
491 lung microbiomes to cigarette smoke. *Thorax* 2022; 77: 191-195.
- 492 35. Ying KL, Brasky TM, Freudenheim JL *et al.* Saliva and Lung Microbiome  
493 Associations with Electronic Cigarette Use and Smoking. *Cancer Prev Res (Phila)*  
494 2022; 15: 435-446.
- 495 36. Camelo-Castillo AJ, Mira A, Pico A *et al.* Subgingival microbiota in health  
496 compared to periodontitis and the influence of smoking. *Front Microbiol* 2015; 6:  
497 119.
- 498 37. Tsay J-CJ, Wu BG, Badri MH *et al.* Airway Microbiota Is Associated with  
499 Upregulation of the PI3K Pathway in Lung Cancer. *American Journal of*  
500 *Respiratory and Critical Care Medicine* 2018; 198: 1188-1198.
- 501 38. Schnell A, Littman DR, Kuchroo VK. T<sub>H</sub>17 cell heterogeneity and its role in tissue  
502 inflammation. *Nat Immunol* 2023; 24: 19-29.

- 503 39. Hacievliyagil SS, Gunen H, Mutlu LC *et al.* Association between cytokines in  
504 induced sputum and severity of chronic obstructive pulmonary disease. *Respir*  
505 *Med* 2006; 100: 846-854.
- 506 40. Wedzicha JA, Seemungal TA, MacCallum PK *et al.* Acute exacerbations of chronic  
507 obstructive pulmonary disease are accompanied by elevations of plasma  
508 fibrinogen and serum IL-6 levels. *Thromb Haemost* 2000; 84: 210-215.
- 509 41. Wilkinson TM, Hurst JR, Perera WR *et al.* Effect of interactions between lower  
510 airway bacterial and rhinoviral infection in exacerbations of COPD. *Chest* 2006;  
511 129: 317-324.
- 512 42. Aaron SD, Angel JB, Lunau M *et al.* Granulocyte inflammatory markers and airway  
513 infection during acute exacerbation of chronic obstructive pulmonary disease. *Am J*  
514 *Respir Crit Care Med* 2001; 163: 349-355.
- 515
- 516

517 **FIGURE LEGENDS.**

518 **Figure 1. Oral Wash  $\alpha$ -diversity is associated with FEV1pp and COPD-related**

519 **quality of life.** A. Oral wash Simpson diversity at visit 1 is associated with FEV1pp (a

520 model covariate) in a model of FE phenotype (FE phenotype V1 LR, FEV1pp CE

521 0.0008, 95% CI [0.00002, 0.0016],  $p=0.027$ . FEV1pp is associated with low Simpson

522 diversity in the adjusted model. B. Oral wash Simpson diversity at visit 1 is associated

523 with SGRQ score at Visit 1 (LR, CE -0.0007, 95% CI [-0.0013, -0.00011],  $p=0.018$ ).

524 Higher SGRQ scores indicate worse COPD-related quality of life.

525

526 **Figure 2. Sputum  $\alpha$ -diversity is associated with exacerbation phenotype, age, and**

527 **culture results.** A. Both the FE phenotype and older age were significantly associated

528 with lower Simpson diversity at Visit 1 (LR, CE -0.077, 95% CI [-0.15, -0.0048],  $p=0.041$

529 and CE -0.0090, 95% CI [-0.015, -0.0025],  $p=0.0080$ , respectively). When the

530 interaction of exacerbation phenotype and age was added to the model, only the

531 interaction of age and exacerbation phenotype was significant (LR, CE -0.013, 95% CI

532 [-0.024, -0.0024],  $p=0.020$ ). The regression lines represent the association between

533 phenotype, age, and Simpson diversity. The significant interaction between age and

534 phenotype indicates that older FE have lower sputum  $\alpha$ -diversity than younger FE or

535 older IE. B. Presence of a pathogen in sputum culture was associated with lower

536 sputum Simpson diversity at V1 (LR, CE -0.19, 95% CI [-0.31, -0.074],  $p=0.0028$ ). When

537 FE phenotype, pathogen, and their interaction were included in the model, only their

538 interaction was significant (V1 LR, CE -0.46, 95% CI [-0.63, -0.30],  $p<0.001$ ). The

539 association between sputum culture positivity during clinically stable periods and  
540 Simpson diversity differs based on exacerbation phenotype.

541  
542 **Figure 3. Beta-diversity reveals clustering by anatomic site.** Principal coordinate  
543 analysis using Bray-Curtis dissimilarity on visit 1 samples demonstrating significant  
544 clustering by anatomic site (PERMANOVA,  $p=0.001$  for all pair-wise testing). Centroids  
545 are illustrated by black dots, with lines connecting each sample to its corresponding  
546 centroid.

547  
548 **Figure 4. Within-subject microbiome composition stability.** Self-report of a COPD  
549 exacerbation between study visits corresponded with an increase in microbiome  
550 compositional changes (increased  $\beta$ -diversity, or a decrease in sample similarity)  
551 compared with subjects who did not experience a COPD exacerbation between study  
552 visits.

553  
554 **Figure 5. Multiple sputum cytokines are associated with  $\alpha$ -diversity.** Increased  
555 sputum concentrations of IL-17A were associated with decreased Simpson diversity in  
556 the sputum, while increased sputum concentrations of IL-6 and IL-8 were associated  
557 with increased Simpson diversity (random effects censored regression model, IL-17A  
558 CE -1.3, 95% CI [-2.2, -0.50],  $p=0.012$ ; IL-6 CE 6.0, 95% CI [2.2, 9.8],  $p=0.012$ ; and IL-8  
559 CE 4.2, 95% CI [1.0, 7.4],  $p=0.0496$ ; respectively).

560

561 **Figure 6. Sputum cytokines are associated with *Moraxella* abundance.** Increased  
562 sputum concentrations of IL-22, IL-17A, and IL-5 were correlated with increased  
563 abundance of *Moraxella* in sputum samples (GEE with Holm correction, IL-22 CE 10.26,  
564 95% CI [3.96, 16.55],  $p=0.027$ ; random effects censored regression model with Holm  
565 correction, IL-17A CE 2.01, 95% CI [1.02, 2.99],  $p=0.0014$ ; and IL-5 CE 1.87, 95% CI  
566 [0.93, 2.81],  $p=0.002$ , respectively).

567  
568 **FIGURES.**  
569

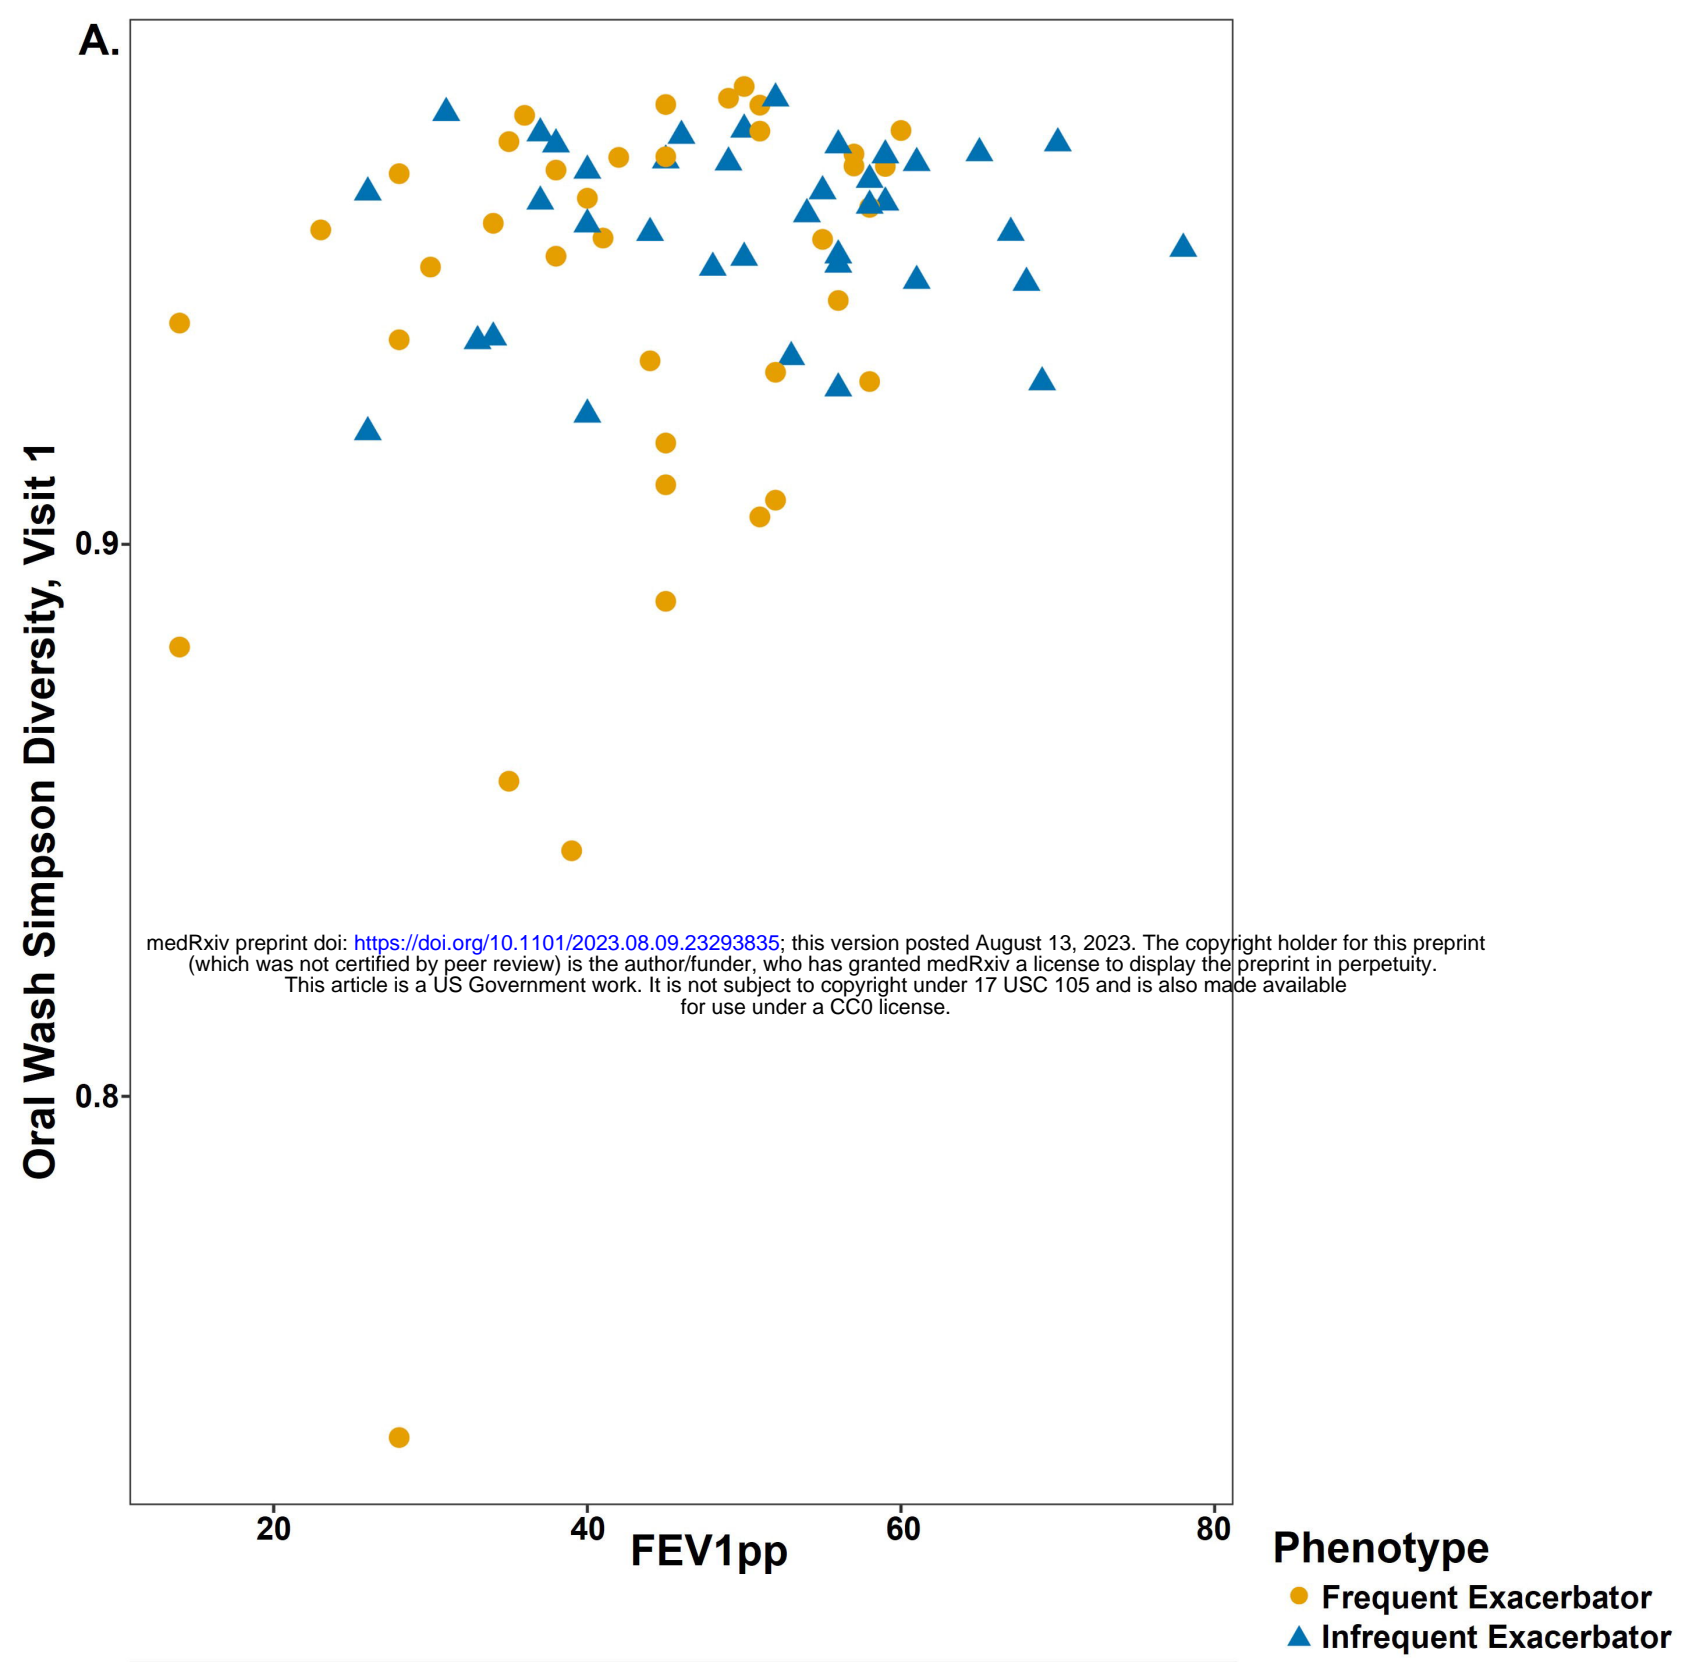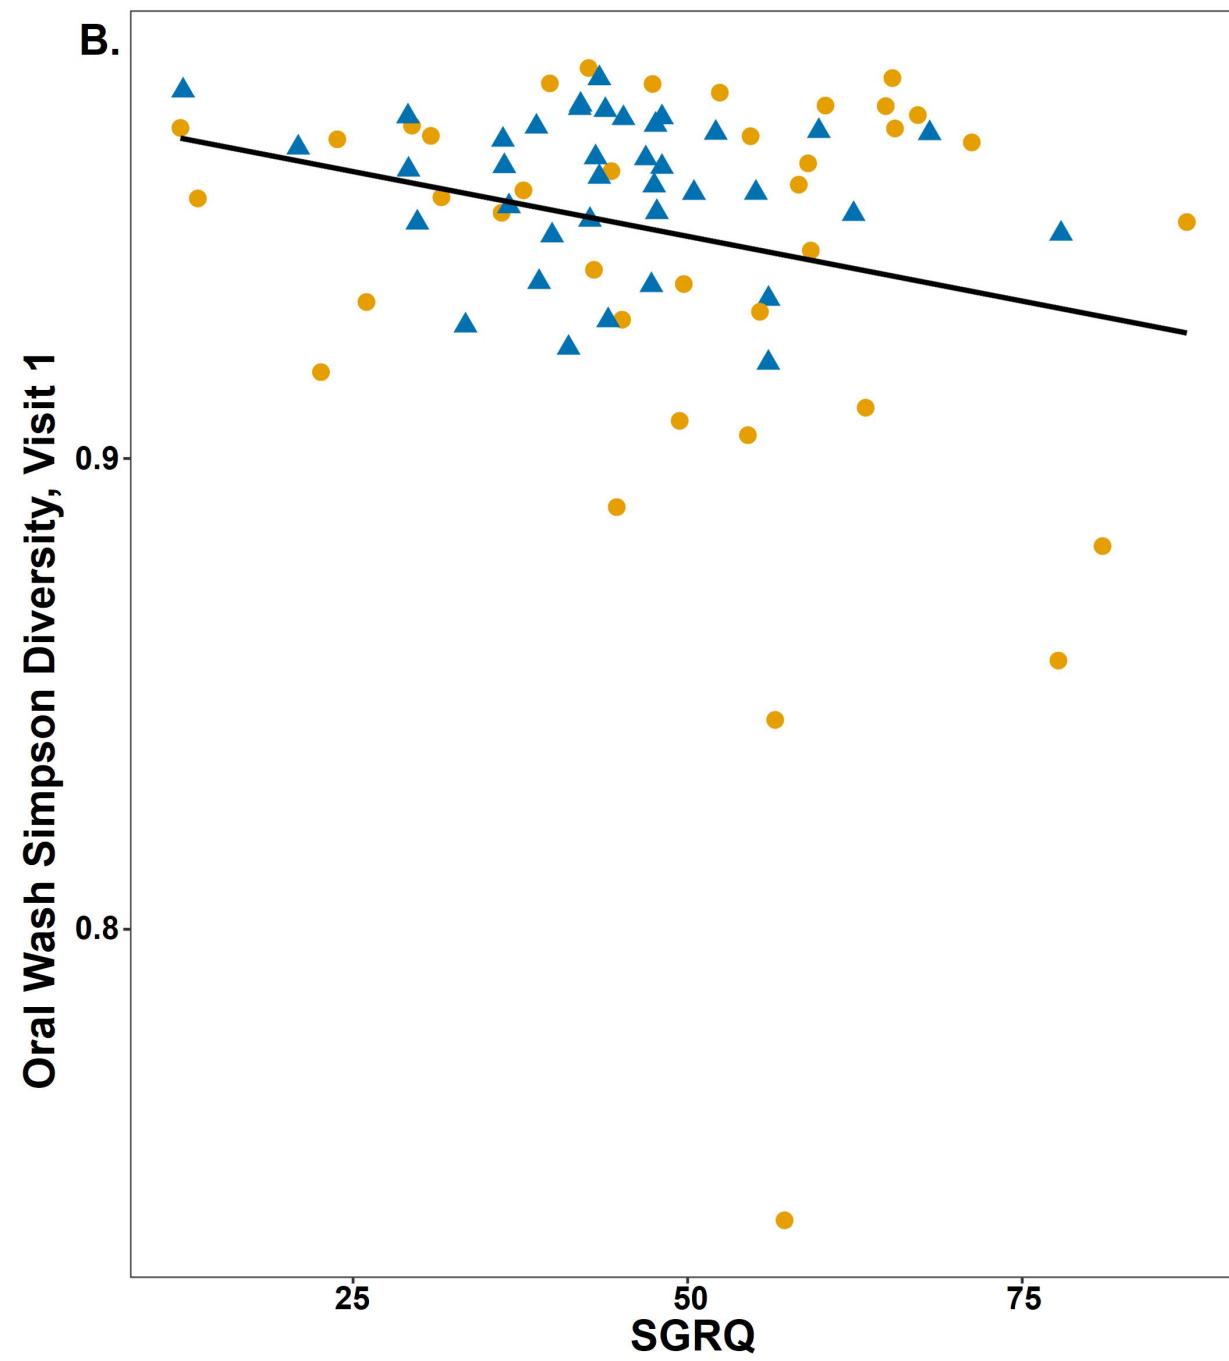

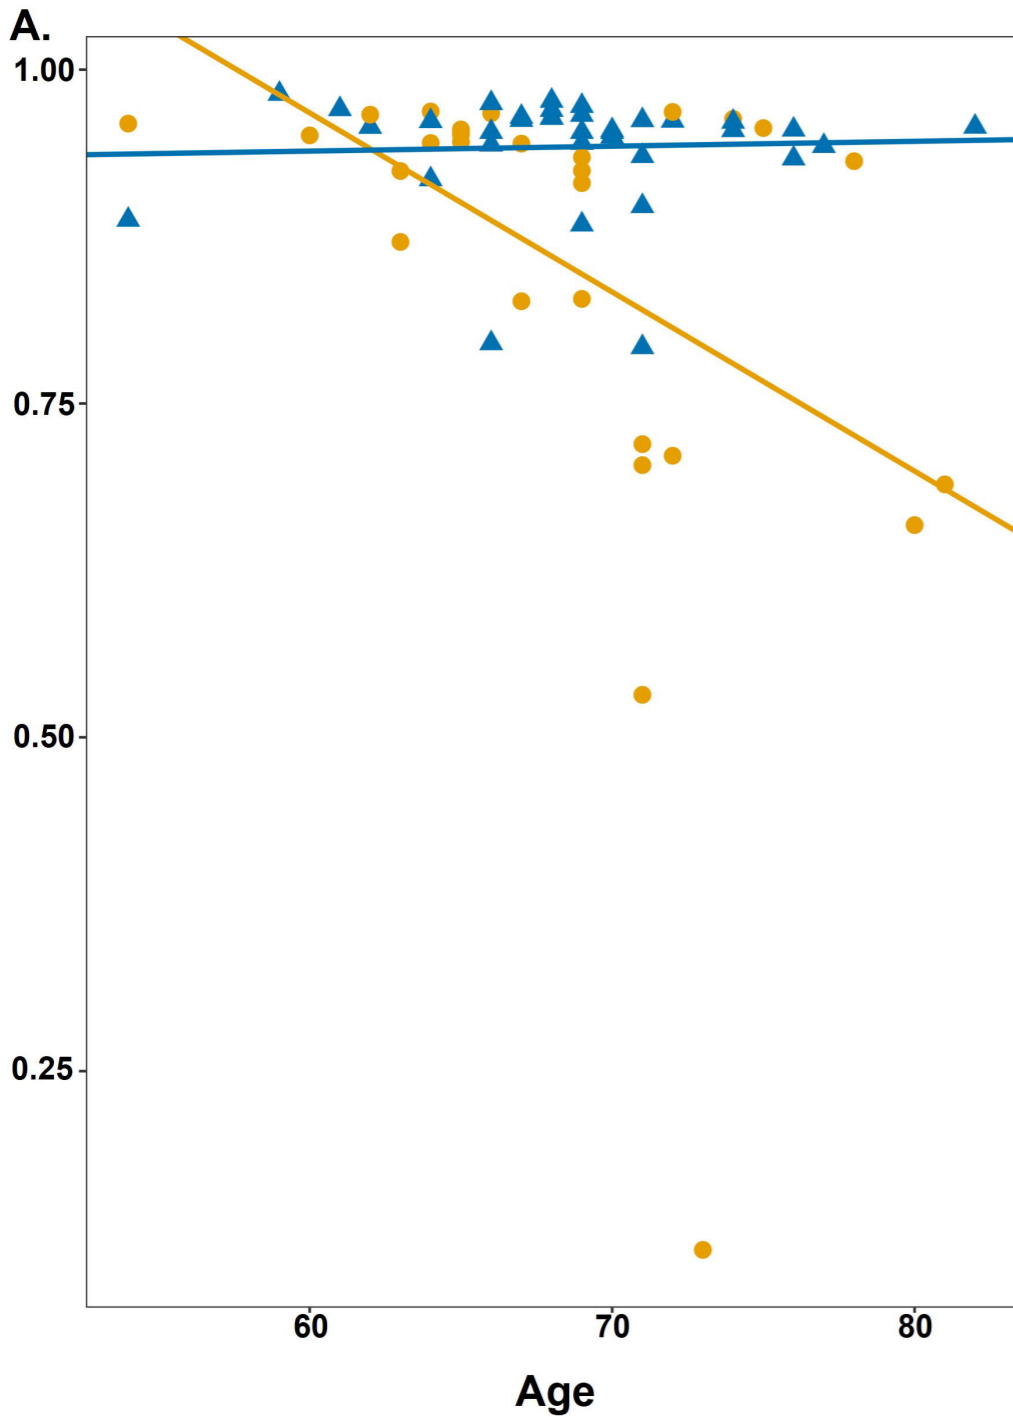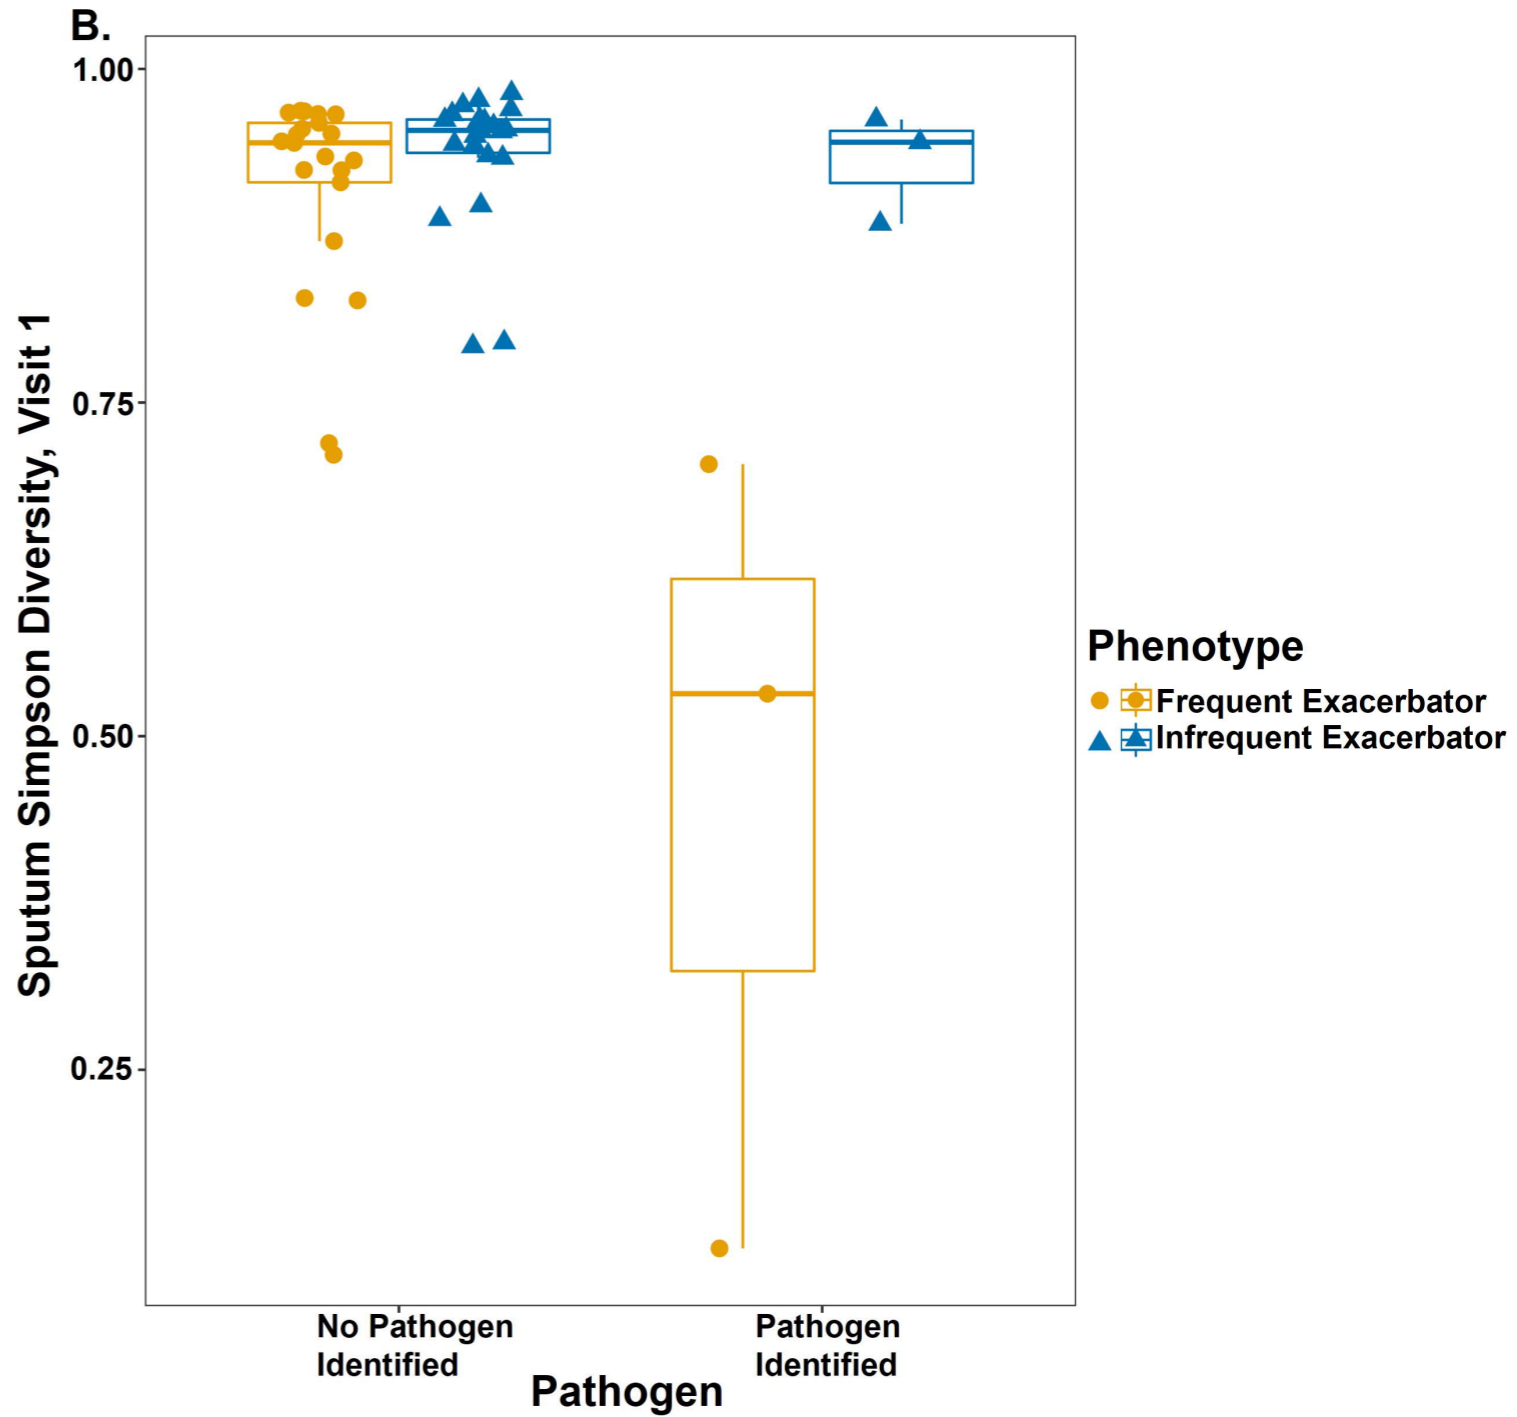

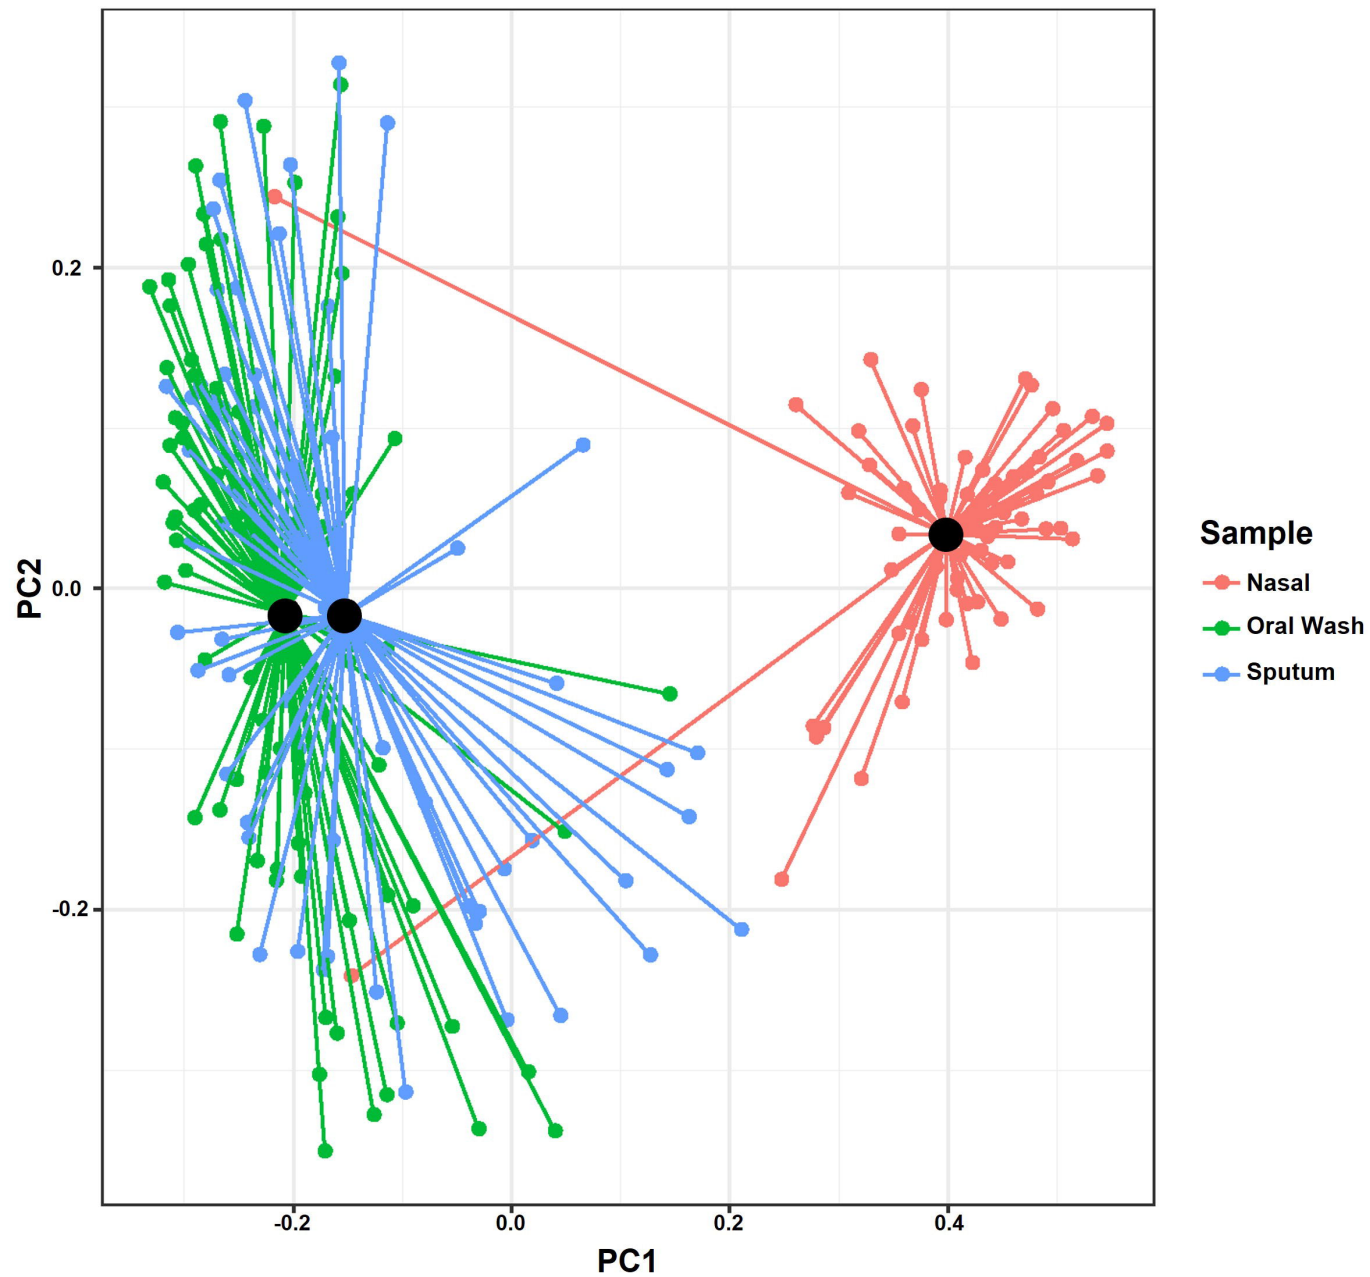



Sputum  $\beta$ -diversity (Visit 1-Visit 2, within subject)

MORE SIMILAR

LESS SIMILAR

1.00  
0.75  
0.50  
0.25

No Yes  
Between-visit COPD Exacerbation

Phenotype

- Frequent Exacerbator
- Infrequent Exacerbator

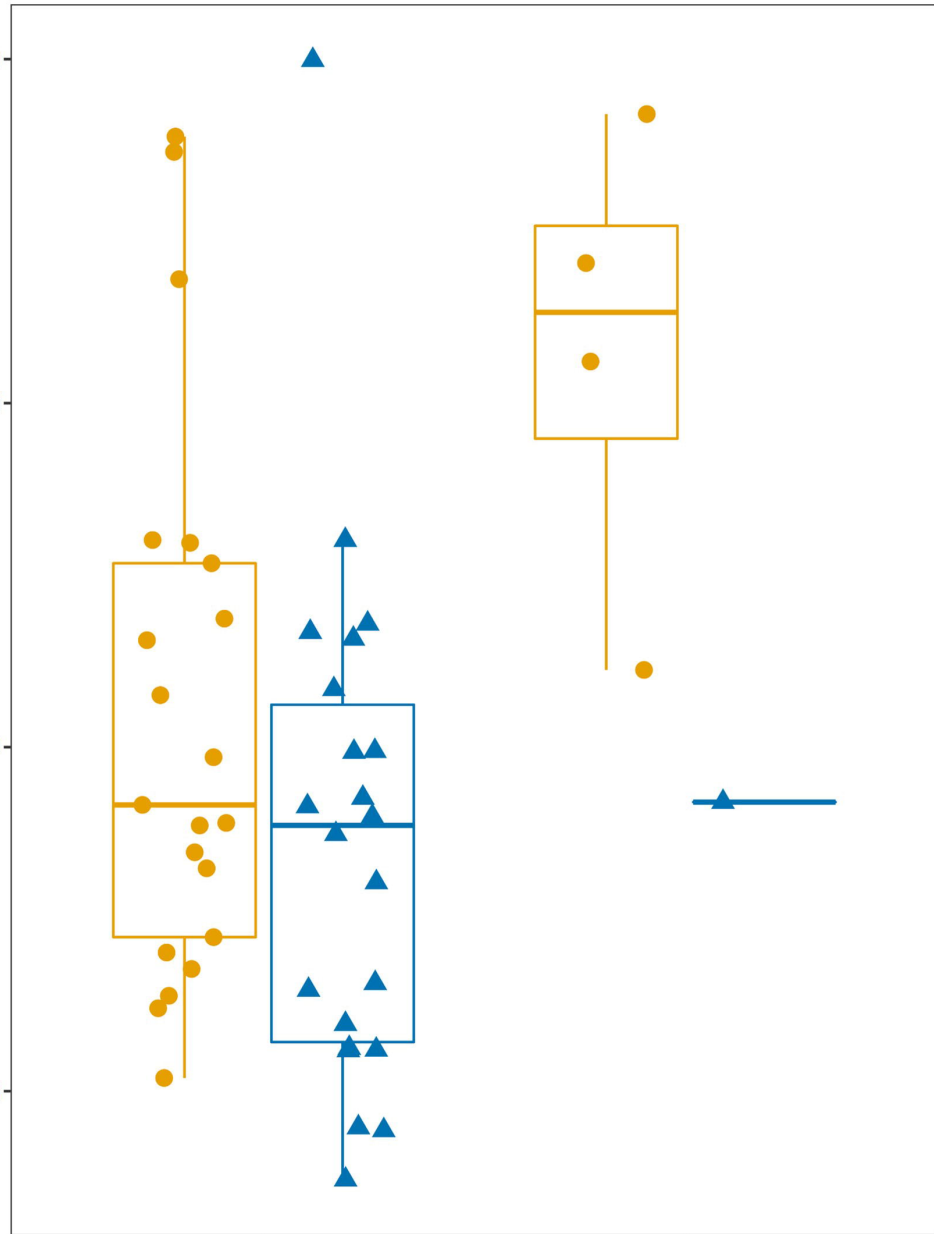

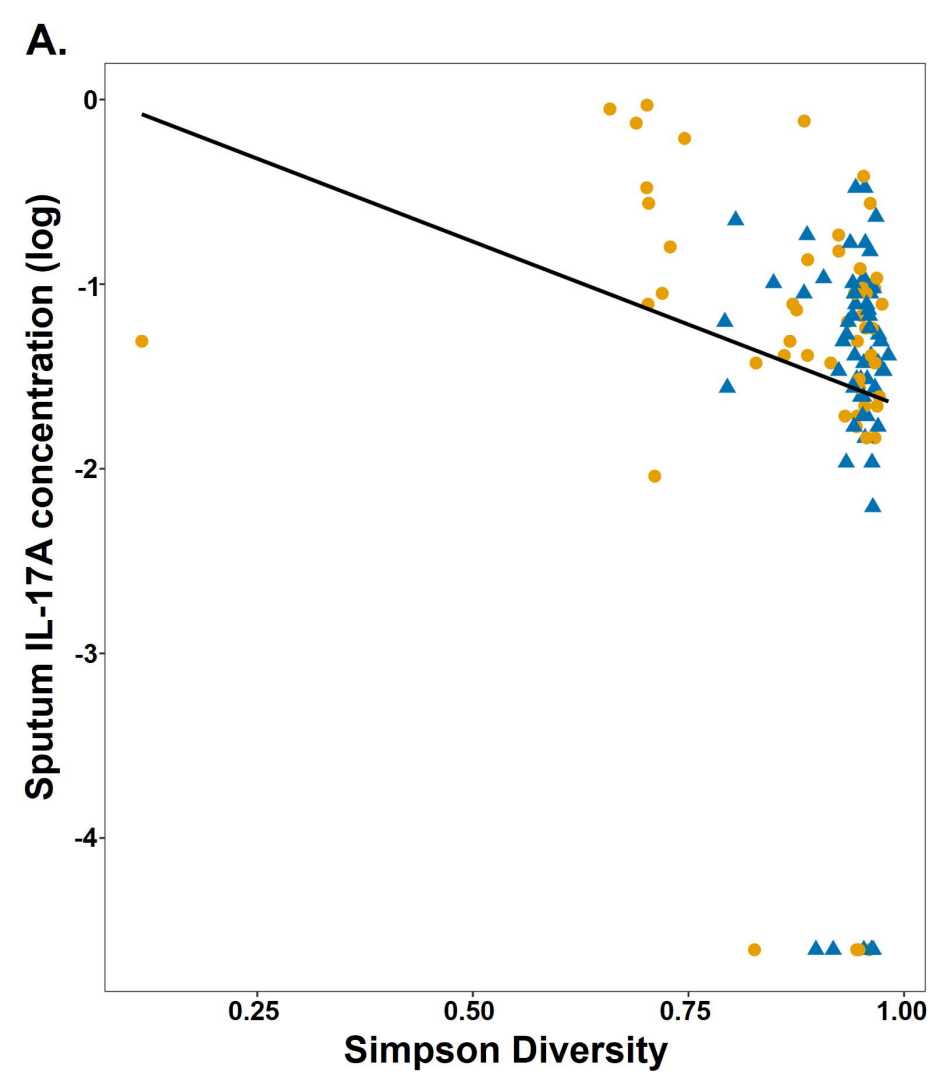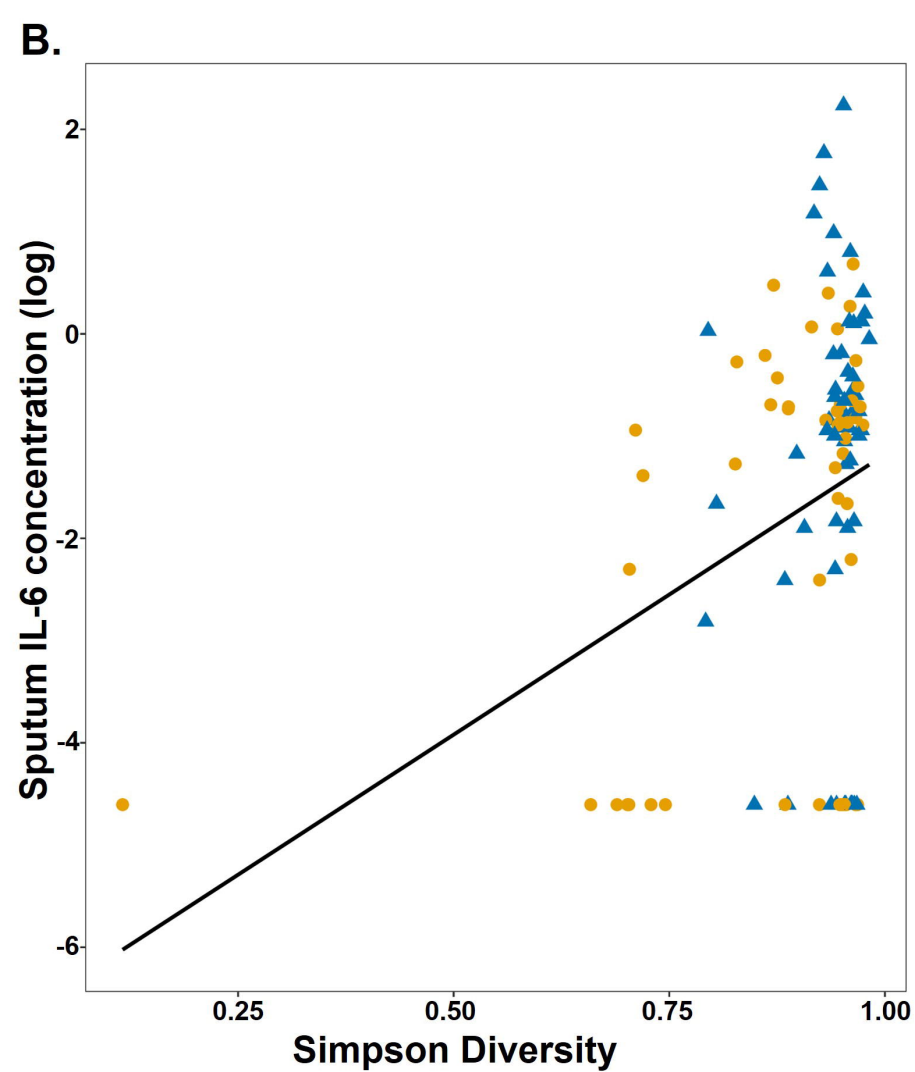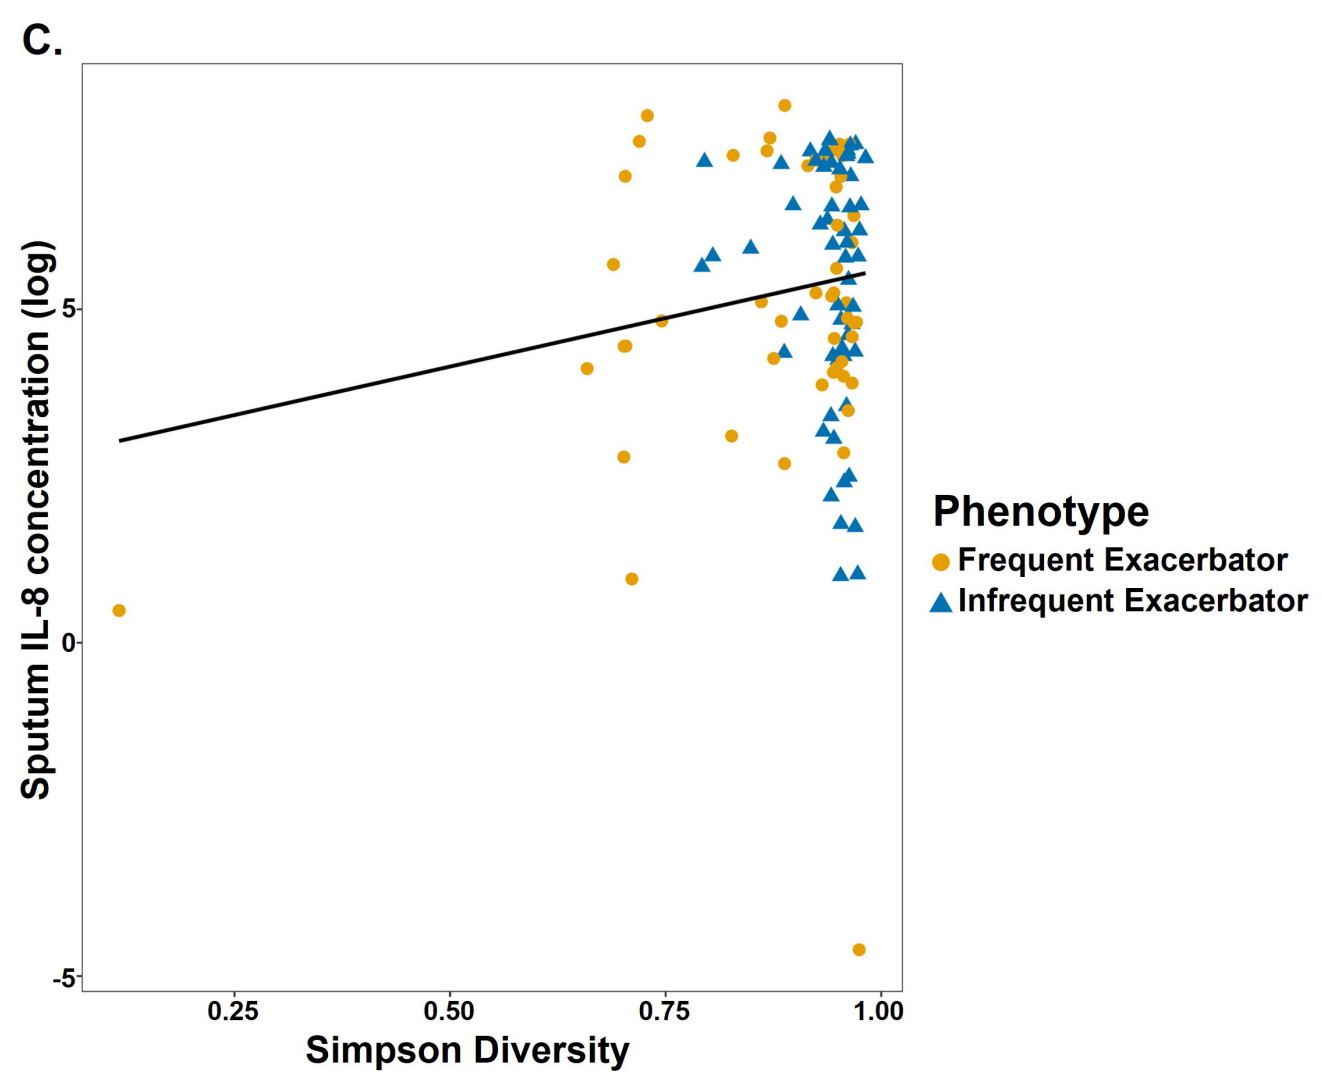

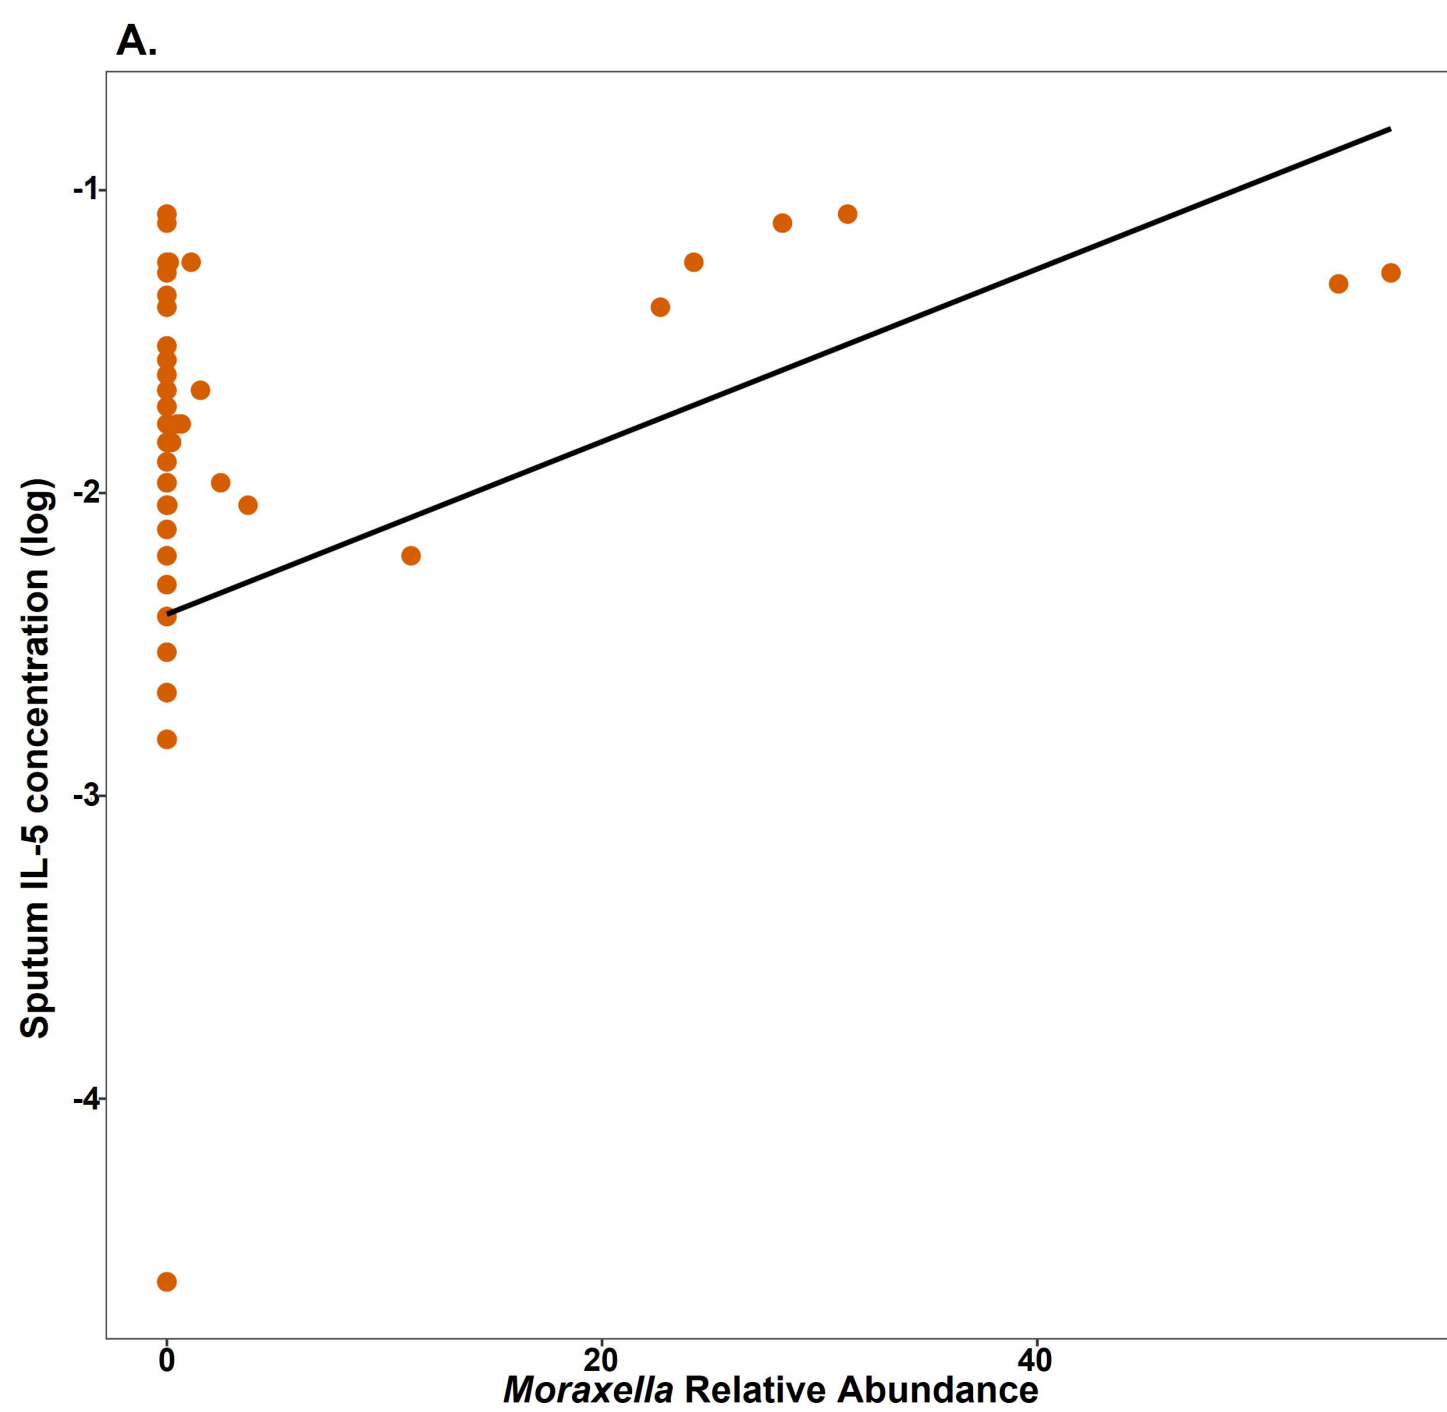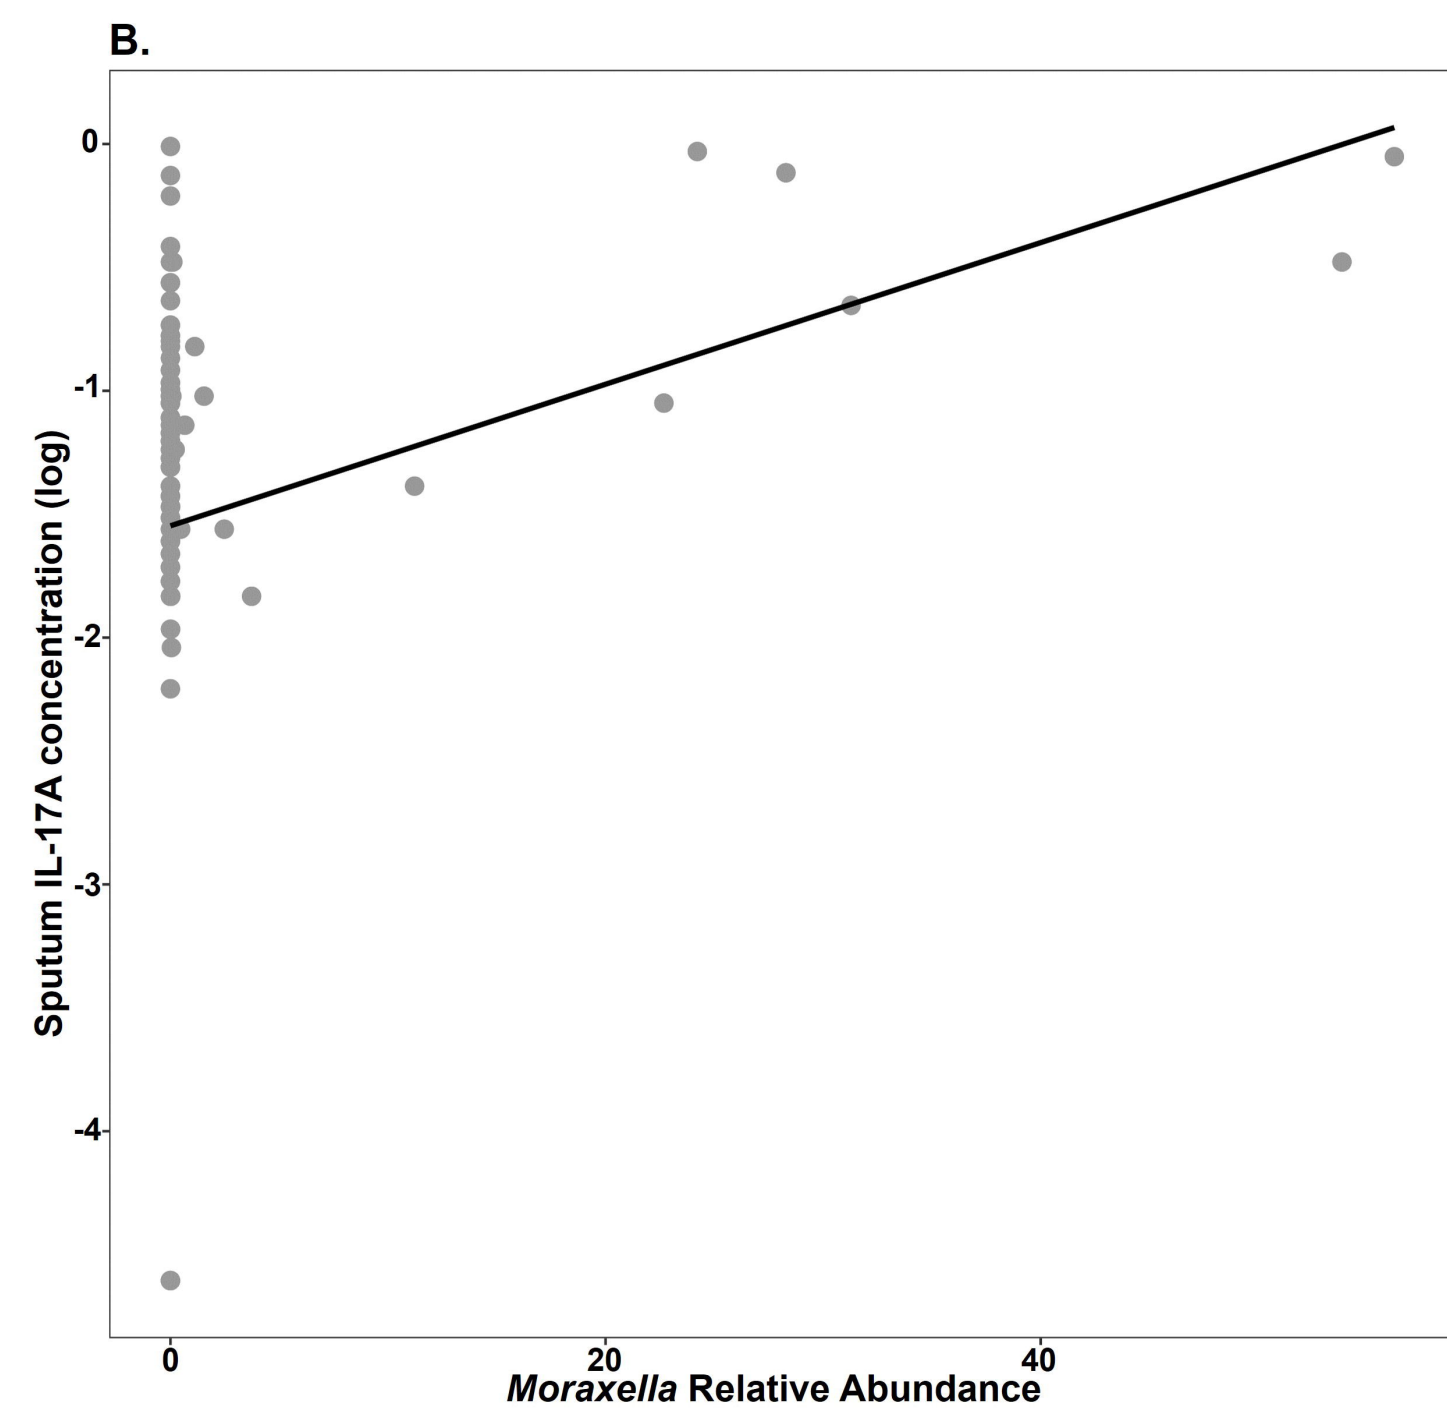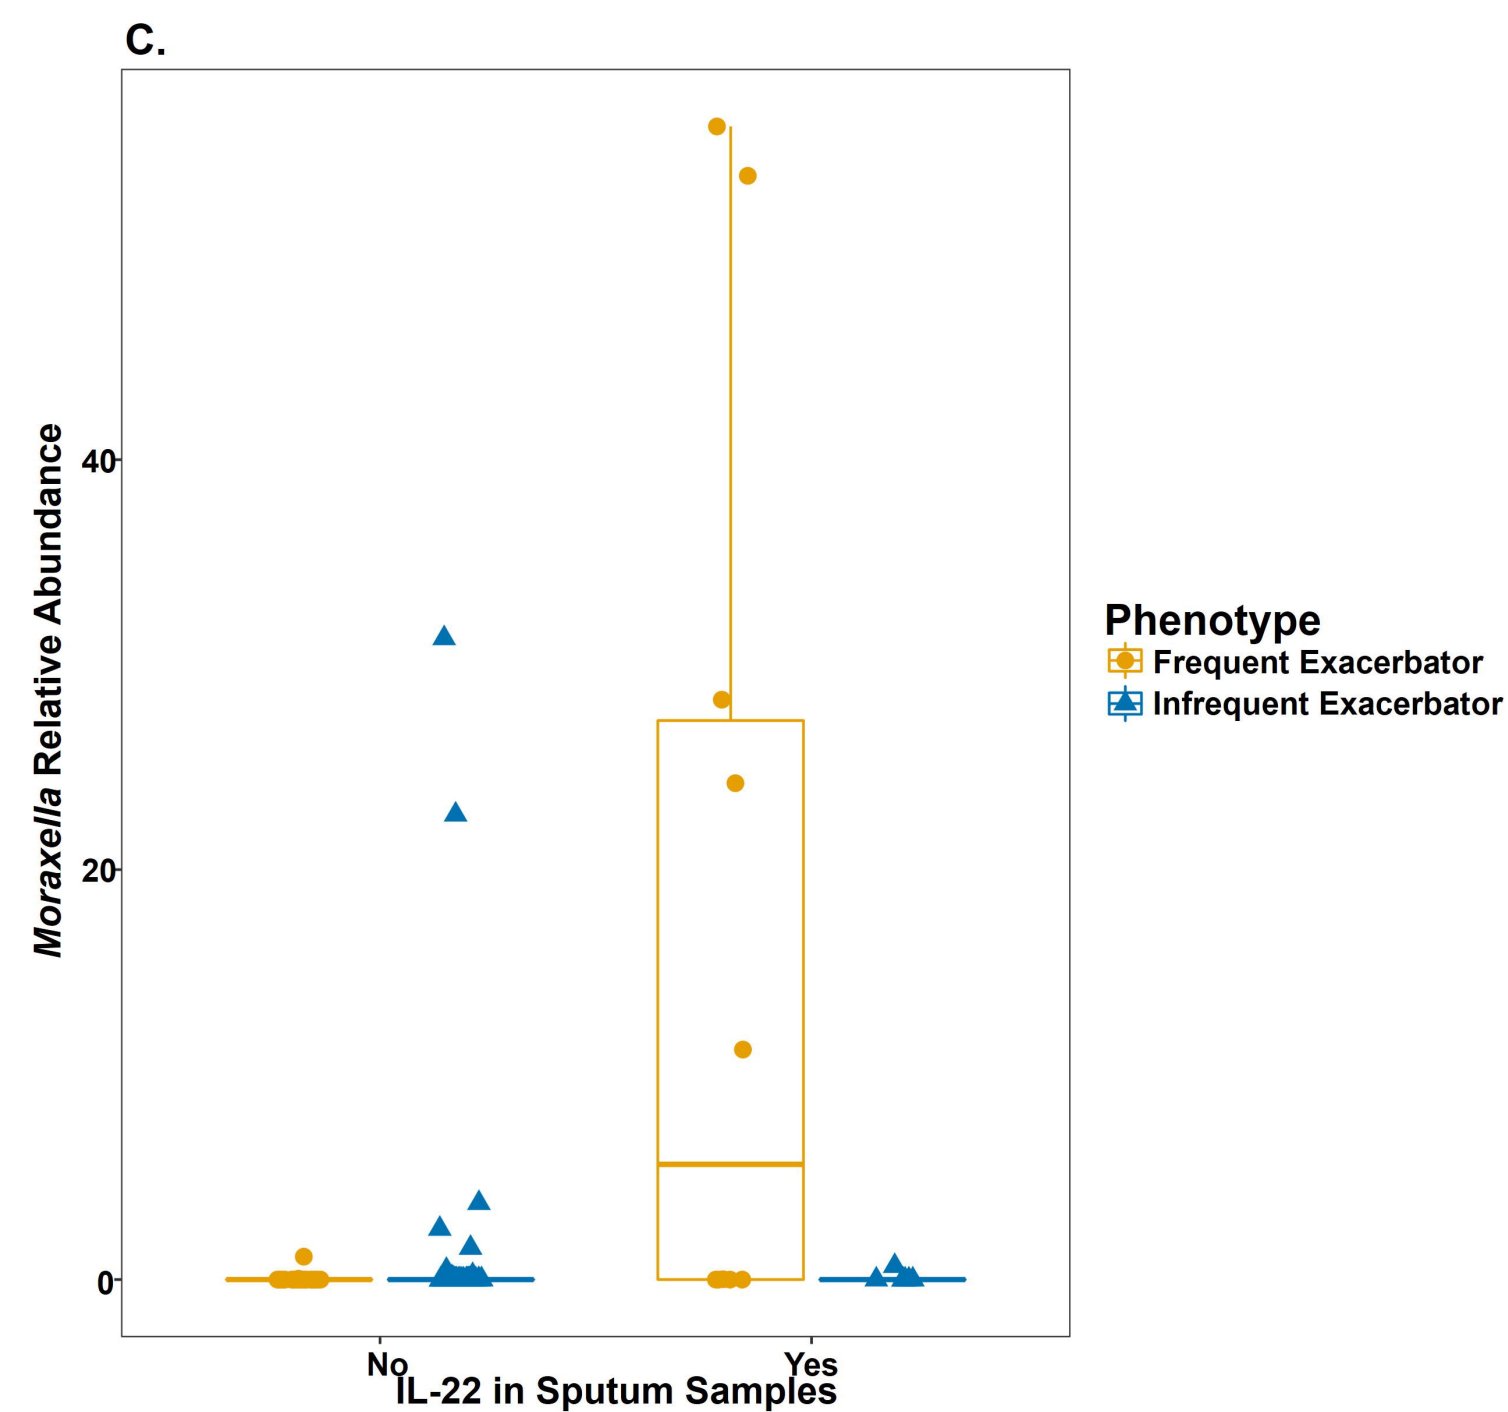

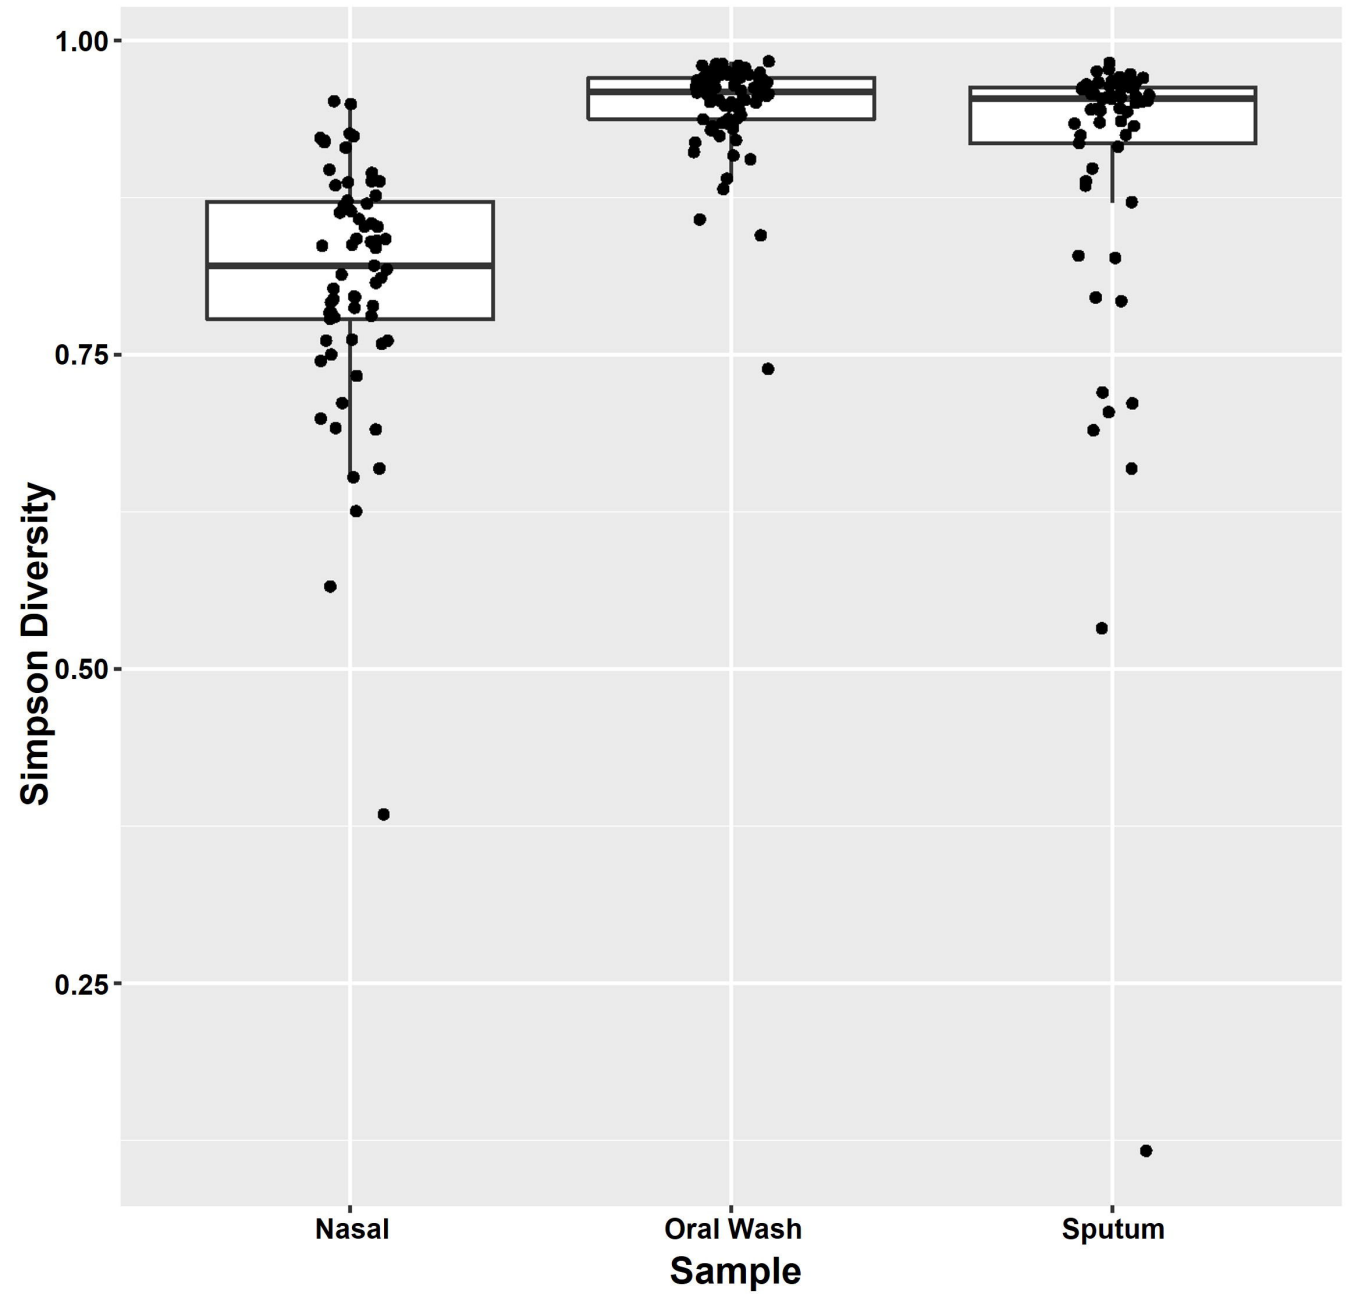

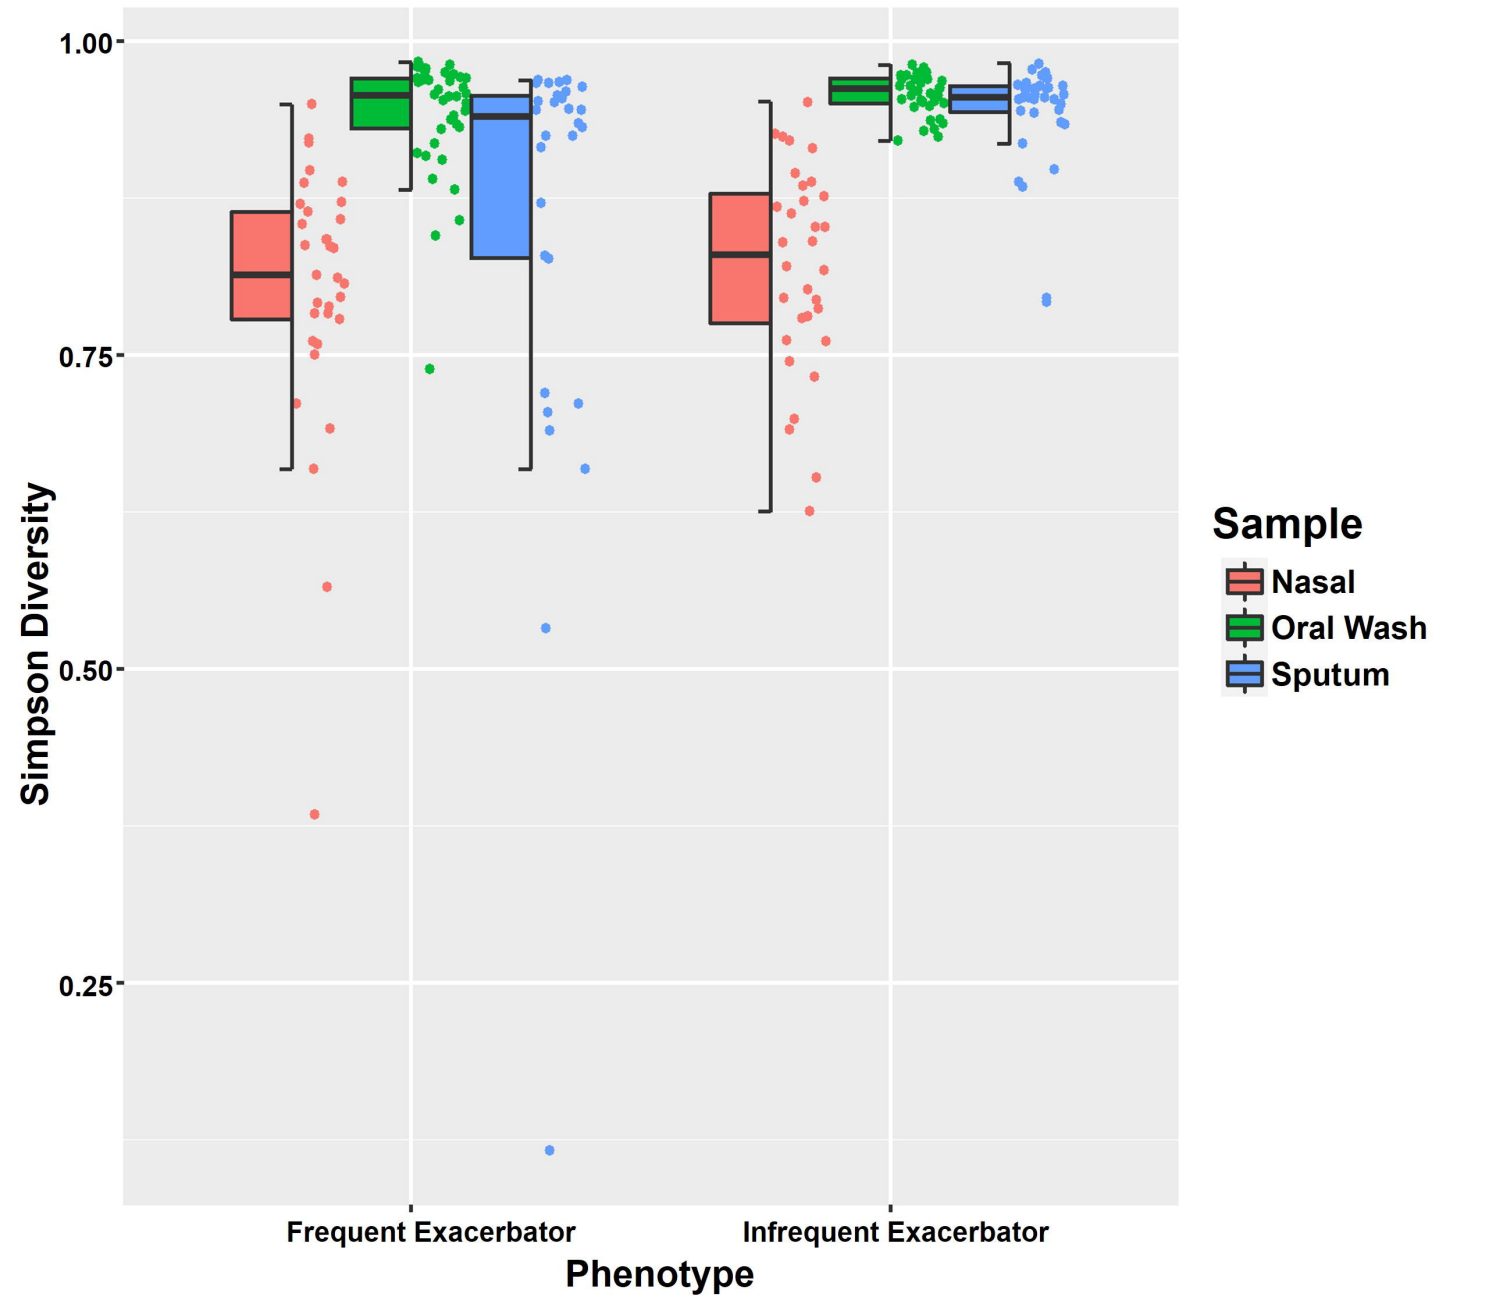

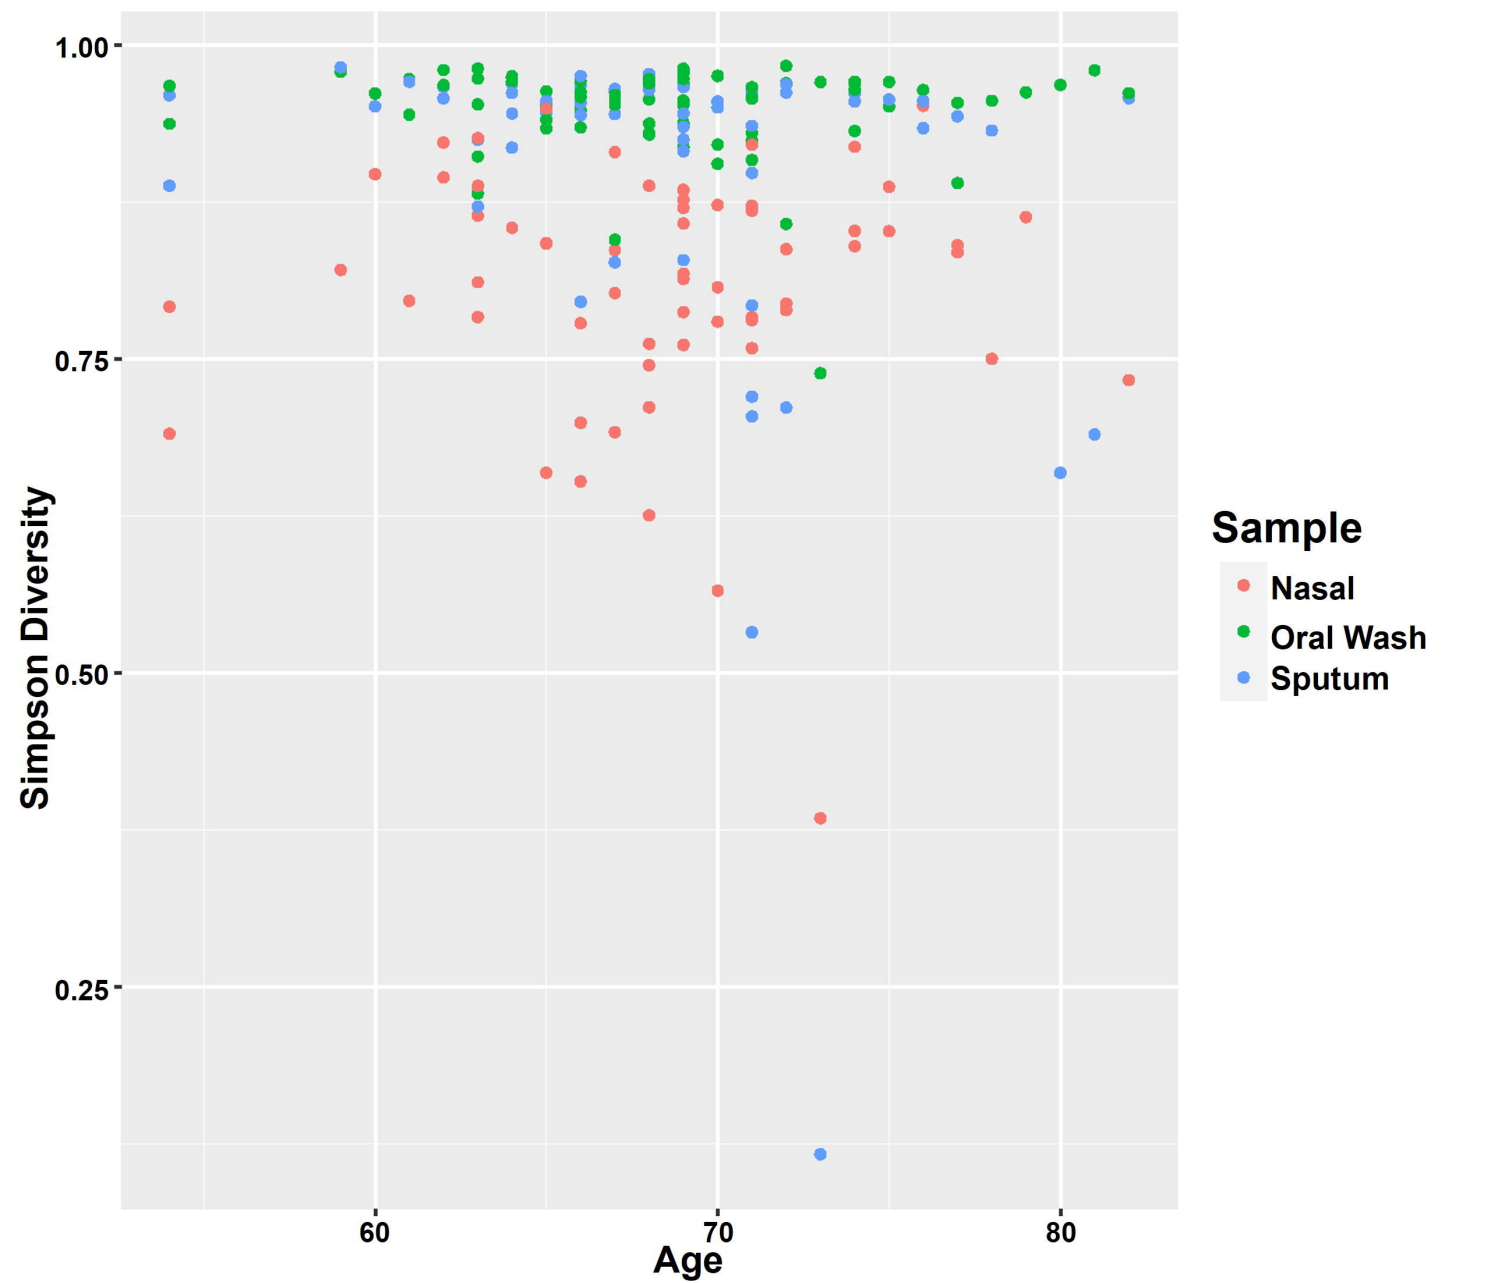

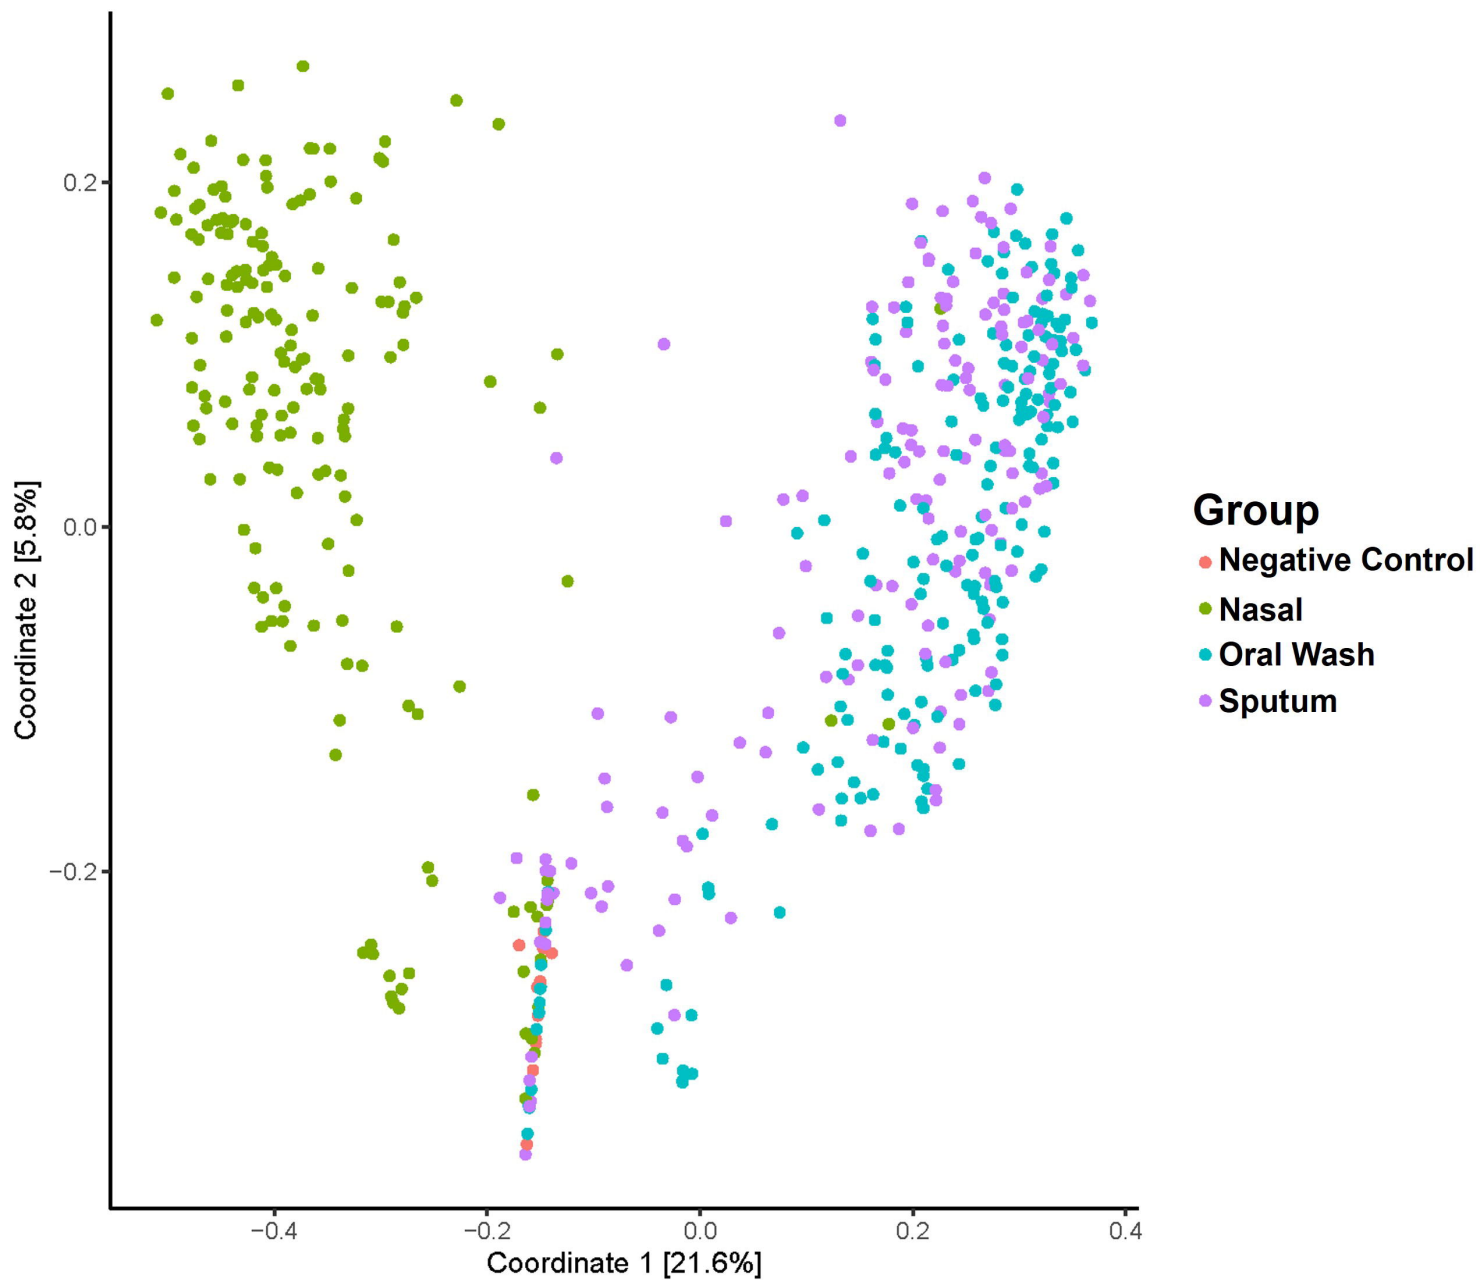

Source: https://medrxiv.org/content/10.1101/2023.08.09.23293835.full.pdf
